1  
2  
3  
4  
5  
6  
7  
8  
9  
10  
11  
12  
13  
14  
15  
16  
17  
18  
19  
20  
21  
22  
23  
24  
25  
26  
27

**Mechanotendography: description and evaluation of a new method for investigating the physiological mechanical oscillations of tendons using a piezo-based measurement system**

**Short title:**  
**Mechanotendography: Evaluation of a piezo-based measurement system**

Laura V Schaefer<sup>1\*</sup>, Frank N Bittmann<sup>1</sup>

<sup>1</sup> Division Regulative Physiology and Prevention, Department Sports and Health Sciences, University of Potsdam, Potsdam, Germany

\*Corresponding author:  
E-mail: [lschaefe@uni-potsdam.de](mailto:lschaefe@uni-potsdam.de) (LVS)

## 29 **Abstract**

30

31 The mechanotendography (MTG) analyzes mechanical oscillations of tendons during muscular actions. It  
32 can be assessed as equivalent to mechanomyography just applied for tendons. Since this method is  
33 unknown, the aim of this investigation was to evaluate the technical reliability of a piezo-based  
34 measurement system used for MTG.

35 The reliability measurements were performed using audio files played by a subwoofer. The thereby  
36 generated mechanical pressure waves were recorded by a piezoelectric sensor based measurement system.  
37 The piezo sensor was fixed onto the subwoofer's coverage. An audio of 40 Hz-sine oscillations and, to stay  
38 close to human applications, four different formerly in vivo recorded MTG-signals from Achilles and triceps  
39 brachii tendon were converted into audio files and were used as test signals. Five trials with each audio  
40 were performed. One audio was used for repetition trials on another day. The correlation of the recorded  
41 signals were estimated by the Spearman correlation coefficient (MCC), the intraclass-correlation-coefficient  
42 (ICC(3,1)), Cronbach's alpha (CA) and by mean distances (MD) between the signals. They were compared  
43 between repetition and random matched signals.

44 The repetition trials show high correlations (MCC:  $0.86 \pm 0.13$ , ICC:  $0.89 \pm 0.12$ , CA:  $0.98 \pm 0.03$ ), low MD  
45 ( $0.03 \pm 0.03V$ ) and differ significantly from the random matched signals (MCC:  $0.15 \pm 0.10$ , ICC:  $0.17 \pm 0.09$ ,  
46 CA:  $0.37 \pm 0.16$ , MD:  $0.19 \pm 0.01V$ ) ( $p = 0.001 - 0.043$ ).

47 This speaks for an excellent reliability of the piezo-based measurement system in a technical setting. Since  
48 research showed that the skin above superficial tendons oscillates adequately, we estimate this tool as valid  
49 for the application in musculoskeletal systems. It might provide further insight into the functional behavior  
50 of tendons during muscular activity.

## 51 **Introduction**

52 Neuromuscular oscillations are frequently considered in medical, sports and  
53 health sciences. Thereby, the motor output is mostly examined by electromyography  
54 (EMG). Meanwhile, the method of mechanomyography (MMG) is also utilized more  
55 often. It is common knowledge that muscle fibers are mechanically oscillating in a  
56 stochastic way distributed in low frequency ranges of around 10 Hz [1-3]. The muscles  
57 function as actuators of the musculoskeletal system, which are mostly linked to the bones  
58 by tendons. Tendons are passive connective tissue structures, which are driven by the  
59 active parts – the muscles. However, the force during movement is transmitted from  
60 muscle via aponeurosis and tendon to the skeleton [4]. Thereby tendons have to transmit  
61 great forces. For instance Achilles tendons are strained with a tensile stress of about 9000  
62 N during running [5-7]. Basic research concerning tendons focuses on the investigation of  
63 cadaver tendons, e.g., to get information about the distinct structures of tendons with  
64 different physiological requirements with regard to their function [8,9] or, respectively,  
65 on modelling as well as linear and non-linear analysis of the mechanics of tendons [10].  
66 Clinical examinations in humans are usually performed by ultrasound to clarify the  
67 anatomical structure or changes of them [11,12]. Real-time ultrasound allows the  
68 scanning of the tendon during isometric contraction [13-17]. Thereby, the focus of  
69 interest lies on the force-displacement [15] and the deformation and stiffness [14] of the  
70 tendon during isometric contraction of the plantar flexors and thereby get information  
71 about stress and strain of the tendon [13]. An oscillatory displacement of the tendon is  
72 not considered thereby. The oscillations of tendons, which are generated during the

73 muscular force transmission, are referred to as tendinous output, which is rarely  
74 investigated in research. The real-time ultrasound is used in lower sampling rates of 25  
75 Hz [14], which is too low to analyze the tendinous oscillations. Established methods as  
76 MMG and EMG, respectively, can only provide information about the muscles, not about  
77 the passive structures. However, these passive structures often develop complaints as,  
78 e.g., tendinopathies. Since a change of motor control is inter alia discussed as potential  
79 factor for the development of tendinopathies [7,13,18-21], it would be of special interest  
80 to investigate the mechanical oscillating behavior of tendons, which are generated by the  
81 connected muscles. The recording of tendinous oscillations might provide further insights  
82 than only capture the muscular activity, since tendons often reflect the oscillations of  
83 more than muscle, e.g. the Achilles tendon, where three muscle heads insert. It also might  
84 reveal more information than looking at the mechanical tendinous structure as fibre  
85 structure and thickness, stiffness, displacement and strain during isometric contraction,  
86 since it includes the oscillatory behavior, which is generated by the neuromuscular  
87 system. Therefore, the recording of tendinous oscillations during motor actions might  
88 provide a more functional insight into the properties of tendons.

89 Recently, the tendon shear wave were assessed using high frame rate ultrasound,  
90 accelerometers or laser Doppler vibrometry after tapping on or shaking the tendon,  
91 respectively [22-25]. The main finding of Salman [24] was that with increasing  
92 contraction, the tendon stiffness increased.

93         The research group around Martin et al. [22Error! Bookmark not defined.]  
94 investigated the spread wave of the Achilles tendon using two accelerometers after

95 tapping on the tendon during cyclic isometric ankle plantar flexion and during walking.

96 Due to the change of shear wave in different gait phases, they draw the conclusion about

97 the passive stretch of the tendon, e.g. before heel strike [22]. This is close to the

98 investigation of [25], in which a myotonometer is used to apply a mechanical impact on

99 the tendon and to record the resulting oscillation of the tissue in relaxed tendons. This

100 technique is quite similar to the Supersonic shear imaging (SSI), which also generates

101 vibrations of tissue (using ultrasonic beams) and examines the shear wave of the tissue

102 afterwards [26]. In all those investigations, firstly, vibrations of the tendon are induced

103 from external to measure the resulting shear waves of the tendon with different

104 techniques. However, when active, the muscles tighten the tendon. In this process, the

105 muscles produce stochastically distributed mechanical oscillations, which can be

106 measured via dynamometry and kinematics also without applying an external vibration

107 or tapping [3,27,28]. The oscillations work in the axial direction along the tendinous

108 strand. Thereby, the muscles act as actuators stimulating the passive tendon

109 longitudinally and laterally. As far as we have assessed, no investigation recorded those

110 oscillations of the tendon during muscle activation. Only a combination of muscle action

111 and application of mechanical vibrations or tapping to the tendon are regarded, whereby

112 especially the evoked shear wave of the tendon was of interest so far. This focuses

113 especially on gathering information about the mechanical behavior after tapping or the

114 like, which changes depending on the structures. Due to the connection of neuromuscular

115 dysbalances and tendon pathologies, a technique, which considers the oscillations, might

116 reveal a more functional insight into the tendinous behavior during muscle activation. The

117 oscillations of tendons during isometric muscle action can be detected by piezoelectric  
118 sensor based measurement systems, which will be presented here. We estimate this  
119 technique as unique and innovative. It is suggested to name this method  
120 mechanotendography (MTG). It can be considered as analogy to MMG but applied for  
121 tendons [3,28,29].

122           Because of the novelty of this method using a piezo-based measurement system,  
123 there is the need of evaluation. The measurement system is adopted from music. The  
124 piezoelectric sensors and amplifiers are usually used to pickup and amplify auditory signal  
125 from instruments. Thereby, they have been proofed to be suitable to take off harmonic  
126 oscillations. Anyway, the justifiable question remains, whether or not piezoelectric  
127 sensors are suitable to record stochastically distributed mechanical oscillations in  
128 frequency areas around 20 Hz like those produced by muscles or tendons.

129           Accordingly, the first step is to investigate whether or not this measurement  
130 system is able to capture low frequency oscillations reliably in a pure technical setting (ex  
131 vivo). This was the objective of this study. The basic applicability of MTG in vivo was  
132 already shown in several publications. MTG and MMG of the triceps brachii muscle and  
133 tendon are, e.g., able to generate coherent behavior during isometric muscle action of  
134 the elbow extensors [3,28]. Furthermore, MTG was applied in an investigation of patients  
135 with Achilles tendinopathy [30]. Detecting the tendinous oscillations using a low cost  
136 method like here presented might provide a more functional insight into the tendinous  
137 behavior during load.

138

## 139 **Materials and methods**

140           Although in the presented study the measurements took place in a solely technical  
141 setting (ex vivo), the method will be called MTG in the following.

### 142 **Piezoelectric sensor and amplifier used for MTG**

143           A large number of piezoelectric sensors were tested for the usage of recording the  
144 mechanical oscillations of tendons and muscles in the Potsdam Neuromechanics  
145 laboratory (Germany). Instrumental pickups are used to convert mechanical vibrations of  
146 solid objects into electrical voltage, which in the usual application results in an audio  
147 signal (tones of instruments). Mechanical pressure or structure-borne sound generate an  
148 electric voltage thereby, e.g. in wind instruments. Considering the tendon as string, the  
149 structure-borne sound generated by the tendinous swing can be recorded by  
150 piezoelectric pickups. However, not every pickup is applicable. Two pickups have been  
151 proven to be suitable to identify the mechanical oscillations of muscle-tendon structures:  
152 Shadow SH 4001, usually used as pickup for clarinets and saxophones, and the Shadow  
153 SH-SV1, a pickup for violins. For the present investigation, the piezoelectric sensor  
154 Shadow SH 4001 was used to verify the reliability of those sensors (in the following called  
155 MTG-sensor). One of the benefits of those sensors is the small size ( $\varnothing 12\text{mm}$ ) (Figure 1).

#### **Fig 1. Setting**

The piezoelectric sensor (Shadow SH 4001) was fixed on the coverage of the subwoofers' loudspeaker (Subwoofer Yamaha No. NS-SW210) and was connected to an amplifier (Nobels pre-amp booster pre-1). The signal was transmitted through an A/D-converter to the measuring notebook (Lenovo V330). The signal was recorded with NI DIAdem 14.0.

156

157           However, the pickups are useless without an adequate amplifier. Therefore, the  
158 choice of an appropriate amplifier is essential. For MMG/MTG this has to be suitable to  
159 amplify low-frequency ranges below 30 Hz. The amplifier Nobels pre-amp booster pre-1,  
160 usually used for guitars, turned out to be applicable. Several other amplifiers were tested,  
161 but were not reproducing and amplifying the signal properly.

## 162 **Setting and procedure**

163           In order to examine the reliability of the piezo-based measurement system,  
164 different audio sounds (origin see below) were played by the Software NI DIAdem 2017  
165 (National Instruments) via a subwoofer. The subwoofer Yamaha No. NS-SW210 Advanced  
166 YST II was used to generate mechanical pressure waves, which were picked up by the  
167 MTG-sensor. The subwoofer has a frequency response from 30 to 160 Hz and, therefore,  
168 appears to be just appropriate to reflect low frequency ranges. The MTG-sensor was fixed  
169 by special ECG- and adhesive tape onto the coverage of the loudspeaker of the  
170 subwoofer, where the pressure waves should be the highest (Figure 1). This same fixation  
171 is also used for measurements in vivo. The picked up signal was amplified by the amplifier  
172 Nobels preamp booster pre-1 and was transferred via A/D-converter (NI USB-6218, 16-  
173 bit) to the measuring notebook, where it was recorded by NI DIAdem 14.0.

174           Five different audios were played by the software NI DIAdem via the subwoofer  
175 and were picked up. Thereof, three audios were converted from different original MTG-  
176 signals recorded during measurements of the Achilles tendon after impact (recorded in  
177 previous investigations on humans [30]): audioMTGAchilles\_1, audioMTGAchilles\_2,  
178 audioMTGAchilles\_3. Furthermore, an original MTG-signal recorded from the triceps



179 brachii tendon during isometric muscle action of the triceps brachii at an intensity of 80%  
180 of the MVC was converted into an audio file (audioMTGtri). They were used to produce a  
181 signal which is close to real application. The setting of capturing those signals in vivo can  
182 be looked up in [Error! Bookmark not defined.] and [Error! Bookmark not defined.],  
183 respectively. Additionally, a 40 Hz sine oscillation was produced by an online tone  
184 generator (audioMTG40Hz) to get further information concerning the amplitude and  
185 frequency reproducibility of the MTG-system.

186 To examine trial-to-trial reliability, five repetitions of each audio were played and  
187 recorded by the piezo-based measurement system at the same day. The  
188 audioMTGAchilles\_1 was re-recorded one day later (5 trials) to investigate the day-to-day  
189 reliability. To investigate the objectivity and validity, the audio of 40 Hz sine oscillations  
190 was used.

## 191 **Data processing and statistical analysis**

192 One part of the data consideration was the visual descriptive evaluation of  
193 repeated trials. For further data evaluation, the raw data of each curve were used. Each  
194 recorded MTG-signal was cut into a short interval of 0.1s (MTGAchilles) and 0.5s (40Hz-  
195 sine, MMGtri), respectively using NI DIAdem 2017. The 0.1s interval of MTGAchilles-audio  
196 was chosen because the original MTG-signal (in vivo) was recorded during a short impact  
197 on the forefoot of the participant from plantar in direction of dorsiflexion, which  
198 generated the here relevant oscillation of the Achilles tendon in the 0.1s interval after  
199 impact [30]. The original MTGtri-signal was originally recorded in vivo during a 10s  
200 isometric muscular interaction of two participants at 80% of the MVC (similar to arm

201 wrestling) [3]. Since the sampling rate was 1000 Hz, 0.5s provides a sufficient long signal  
202 for the investigation of reliability. The measurement parameter in the present study (ex  
203 vivo) was the amplified voltage of the piezoelectric sensor gathered from the mechanical  
204 oscillations of the subwoofer during audio replay. To investigate the reproducibility, the  
205 repetition trials of each audio were compared between the trials by analyzing the  
206 following parameters: (1) mean distances of all data points between the curves (MD) in  
207 Excel 2016 and (2) the spearman correlation coefficient (MCC), (3) the Intraclass  
208 correlation coefficient (ICC(3,1)) and (4) Cronbachs alpha (CA) in IBM SPSS 25. Concerning  
209 the MD (1) and MCC (2), ten values arise from the five trials for each signal. For further  
210 statistical comparisons, therefore, the arithmetic mean (M) and standard deviation (SD)  
211 were calculated.

212 To compare these items to randomized matched curves, MTG-signals of the three  
213 different MTGAchilles-audios were used to form five random groups. Only signals of the  
214 MTGAchilles audios were chosen, since the 40 Hz-sine and the MTGtri-audio show very  
215 different characterization compared to the MTGAchilles-signals and would skew the  
216 results significantly. In human investigations, the MTG is used to compare similar settings,  
217 therefore, a MTG of the Achilles tendon after impact, a MTG of the triceps brachii muscle  
218 during isometric muscle activation and 40Hz-sine oscillations would not be compared  
219 directly. Therefore, the randomized groups only contained trials of the MTG-audios of the  
220 same setting. The above listed parameters (1) to (4) for estimation of the reliability were  
221 also calculated for the randomized groups.

222 Using IBM SPSS 25, the parameters (1) to (4) were tested concerning normal  
223 distribution using the Shapiro-Wilk-test in each group. In case of normal distribution, the  
224 t-test for dependent samples was used to compare the identical repetition groups to the  
225 random ones statistically (MCC, ICC). The data of the other parameters (MD, CA) were not  
226 normally distributed. Therefore, the non-parametric Wilcoxon-test was used for those  
227 comparisons. The tests for dependent samples were chosen, since the random group also  
228 contains trials of the identical audio groups, and hence, the groups are not completely  
229 independent.

## 230 Results

231 To illustrate the reproducibility of the oscillation characteristics of the original  
232 MTG-signals and the recorded corresponding audio-signal from this investigation, Figure  
233 2 shows exemplarily one original MTGAchilles-signal and the corresponding recorded  
234 signal in the present setting using the subwoofer with fixed MTG-sensor. As shown, the  
235 frequency is reproduced precisely, the amplitudes differ.

**Fig 2.** Exemplarily signals of the original MTGAchilles\_1 signal (blue) compared to the  
MTGAchilles\_audio (red) played by the subwoofer and recorded by the piezo-based  
measurement system in the present technical setting.  
236

237 The curve shapes of the identical recorded trials are shown in Figure 3. In each  
238 diagram, five or, respectively, ten repetitions are displayed and reveal a good  
239 reproducibility. The day-to-day trials of the audioMTGAchilles\_1 are displayed in Figure  
240 4. As can be seen, the 10 signals lie highly reproducible one above the other. For  
241 quantification of this, the parameters (1) to (4) are regarded.

**Fig 3.** Displayed are the recorded MTG-signals by the piezo-based measurement system from the replay of the subwoofer. Each five trials of the same MTG audio and, respectively, 10 repetition trials of the 40Hz sine audio are illustrated in one diagram.

242

**Fig 4.** Displayed are each five repetition trials of the audioMTGAchilles\_1 recorded with the piezo-based measurement system on two separate days (red colors =  $t_0$ ; blue colors =  $t_1$ ).

243

## 244 Mean distances and correlation of repetition trials

245 The mean distances, mean spearman rank correlation, ICCs and Cronbachs alpha

246 between the groups of the identical repetition trials and the random matched group are

**Table 1.** The parameters averaged mean distances (MD), mean spearman correlation coefficient (MCC), Intraclass correlation coefficient (ICC(3,1)) and Cronbachs alpha (CA) calculated between each 5 identical repetition trials for each MTG-audio and between random matched signals (MTG\_rand) are displayed. Arithmetic mean (M), standard deviation (SD) and coefficient of variation (CV) are given.

|                                   | Identical repetition trials |             |             |             |            | Random trials |             |             |             |
|-----------------------------------|-----------------------------|-------------|-------------|-------------|------------|---------------|-------------|-------------|-------------|
|                                   | MD                          | MCC         | ICC         | CA          |            | MD            | MCC         | ICC         | CA          |
| audioMTGAchilles_1_t <sub>0</sub> | 0.03                        | 0.73        | 0.72        | 0.93        | MTG_rand_1 | 0.18          | 0.25        | 0.25        | 0.50        |
| audioMTGAchilles_1_t <sub>1</sub> | 0.01                        | 0.89        | 0.93        | 0.99        | MTG_rand_2 | 0.19          | 0.17        | 0.21        | 0.44        |
| audioMTGAchilles_2                | 0.02                        | 0.92        | 0.96        | 0.99        | MTG_rand_3 | 0.20          | 0.14        | 0.14        | 0.33        |
| audioMTGAchilles_3                | 0.02                        | 0.96        | 0.98        | 1.00        | MTG_rand_4 | 0.17          | 0.20        | 0.23        | 0.46        |
| audioMTGtri                       | 0.08                        | 0.67        | 0.76        | 0.94        | MTG_rand_5 | 0.20          | -0.01       | 0.04        | 0.11        |
| audioMTG40Hz                      | 0.02                        | 0.99        | 0.99        | 1.00        |            |               |             |             |             |
| <b>M</b>                          | <b>0.03</b>                 | <b>0.86</b> | <b>0.89</b> | <b>0.98</b> | <b>M</b>   | <b>0.19</b>   | <b>0.15</b> | <b>0.17</b> | <b>0.37</b> |
| <b>SD</b>                         | 0.03                        | 0.13        | 0.12        | 0.03        | <b>SD</b>  | 0.01          | 0.10        | 0.09        | 0.16        |
| <b>CV</b>                         | 0.84                        | 0.15        | 0.13        | 0.03        | <b>CV</b>  | 0.07          | 0.65        | 0.49        | 0.43        |

247 displayed for each recorded audioMTG-signal in Table 1. The comparisons of group

248 averages ( $M \pm SD$ ) are illustrated in Figure 5.

**Fig 5.** Arithmetic mean and standard deviation of the parameters mean distances (MD), mean spearman correlation coefficient (MCC), intraclass correlation coefficient (ICC(3,1)) and Cronbachs alpha (CA) of the identical repetition trials (blue) compared to the random matched group (orange). \* $p = 0.043$ , \*\*\* $p = 0.001$

249

250 Looking at the correlation coefficients (MCC, ICC, CA) it is visible that the identical

251 repetition trials have values from 0.67 to 1.0, which indicate good to excellent reliability

252 [31], whereas the random matched groups show values from -0.01 to 0.25, which indicate

253 no or poor reliability [Error! Bookmark not defined.] (Table 1). This is further supported  
254 by the group comparisons: The statistical comparisons between identical and random  
255 groups concerning the MCC and ICC show very high significance with  $t(4) = 9.104$  ( $p =$   
256  $0.001$ ,  $r = 0.977$ ) and  $t(4) = 9.317$  ( $p = 0.001$ ,  $r = 0.978$ ), respectively. The Cronbach's alpha  
257 show lower, but still significant differences ( $W = 2.023$ ,  $p = 0.043$ ,  $r = 0.905$ ). These results  
258 indicate a significantly higher correlation of the identical repetition groups compared to  
259 the random matched ones.

260 In contrast, the parameter MD behave inversely: The averaged mean distances  
261 are significantly lower in the identical repetition group with mean values of  $0.03 \pm 0.03$  V  
262 compared to the random matched group with an averaged MD of  $0.19 \pm 0.01$  V  
263 ( $W = -2.023$ ,  $p = 0.043$ ,  $r = 0.905$ ); reflecting the smaller distances between the curves of  
264 the identical repetition trials compared to the random matched signals. The distance  
265 between random matched curves are more than six times higher than the identical  
266 repetition trials.

267 For each comparison a high effect size of  $r > 0.90$  is obtained, which underlines  
268 the significant differences between the identical and random groups.

## 269 Discussion

270 The results show that the identical repetition group has significantly higher  
271 correlation values and considerably lower mean distances between the trials compared  
272 to the random matched group. Both results point out, that the curves during repetition

273 of the same audio signal behave similarly. This indicates a high reliability of the piezo-  
274 based measurement system *ex vivo*.

275 The random matched curves behave inverse: The correlation parameters show, if  
276 at all, low correlation values and the mean distances are more than six times higher  
277 compared to the repetition curves of identical audio signals. This indicates a good  
278 distinction between different signals.

279 The discussion should focus on the technical aspects of the reliability measures  
280 and on the meaning of those for the application *in vivo*.

## 281 **Reproducibility of MTG-signals in the technical setting**

282 The comparison of the original audio signals and the recorded signals with the  
283 piezoelectric sensor, which is exemplarily displayed in Figure 2, demonstrates a good  
284 agreement of wavelength, which indicates a high reproducibility of the frequency. The  
285 amplitude is lower in the recorded audio signal. Reasons for this lie probably in the replay  
286 of the subwoofer. The signal also shows partly signs of distortion. Because the undistorted  
287 original signals were detected *in vivo* by the same sensor type, the sensor can be excluded  
288 as the origin of this phenomenon. Therefore it is likely produced by the subwoofer,  
289 especially by the speaker's coverage which is not as elastic as the speaker itself.  
290 Furthermore, especially in low frequency areas below 30 Hz, the subwoofer is not able to  
291 reproduce the sounds adequately. Since the mechanical oscillations of muscles and  
292 tendons during isometric muscle activity are to be found in those low ranges [1,2,3], the  
293 audios played by the subwoofer might reflect those frequency areas not as good as the  
294 original MTG-signals. Since the MTG-signals of the *in vivo* measurements of the Achilles

295 tendon after impact show higher frequencies [30], they were chosen for the present  
296 reliability investigations, having in mind, that the subwoofer is able to reproduce them  
297 more precisely.

298         The limited frequency response of the subwoofer is especially visible in comparing  
299 the original MTG-signal of the triceps brachii tendon and the related recorded audio MTG-  
300 signal using the subwoofer (Figure 6). It is clearly visible that the signals do not match.  
301 This is led back to the low frequencies of about 15 Hz of the MTGtri-signal. The repeated  
302 recordings of this MTG-audio signal, however, indicate an only just excellent reliability  
303  $ICC(3,1) = 0.76$  ( $p = 0.000$ ) [31]. It is concluded that the reproducibility of five repetition  
304 trials is very good, although the subwoofer is not able to rebuild the MTGtri-signal  
305 appropriately due to technical limitations of the frequency response of the subwoofer. It  
306 is assumed that with another subwoofer, which reproduces the low frequency ranges  
307 properly, the original and the recorded signals would be as similar as it was to be found  
308 for the MTG-signals of the Achilles tendon after impact. However, usually subwoofers are  
309 not required to play frequency ranges below 20 Hz, since they are not hearable for  
310 humans. Infrabass subwoofers would be able to reproduce such frequency ranges, but  
311 are only used in the professional event areas and are very expensive. Therefore, an  
312 infrabass subwoofer was not applicable in this setting. The aim of showing the  
313 reproducibility of repetition trials still is reached by the results of recording the MTGtri  
314 played by the subwoofer and recorded by the piezo-based measurement system from the  
315 coverage of the loudspeaker.

## 316 **Reliability of repeated measurements using the piezo-based** 317 **measurement system**

318           The best reproducibility and, therefore, reliability was found for the technical 40  
319 Hz oscillations ( $ICC(3,1) = 0.99$ ,  $p = 0.000$ ,  $MCC = 0.99$ ), assuming that the piezoelectric  
320 sensor based measurement system is suitable to record harmonic oscillations properly in  
321 amplitude and frequency from the mechanical pressure waves of a subwoofer. The  
322 oscillations produced by a muscle or tendon is rather comparable to inharmonic  
323 structure-borne sound. As indicated here, the reproducibility of a former biological  
324 inharmonic signal is also captured in a reliable way using the subwoofer. Therefore, it  
325 can be concluded that the piezoelectric sensor based measurement system is a valuable  
326 tool to record mechanical pressure waves or structure-borne sound. This is not surprising  
327 with regard to the common application of those sensors in music. If the piezoelectric  
328 sensor would not reproduce the mechanical pressure waves in frequency and amplitude  
329 appropriately, the sound would be distorted. But what are the benefits comparing  
330 piezoelectric to acceleration sensors, which are mostly used for such investigations  
331 [1,22,32].

## 332 **Advantages of piezoelectric sensors used for MTG / MMG**

333           From experiences in the Neuromechanics Lab, piezoelectric sensors, such as  
334 pickups, reflect the mechanical oscillations very precisely with an exceptional good signal  
335 to noise ratio (SNR). This is visible in Figure 6. The original signal of MTGtri was recorded  
336 from the triceps brachii tendon during isometric muscle activity of the elbow extensors



337 with an intensity of 80% of the MVC. The raw data are displayed (Figure 6), thus, no  
338 filtering or smoothing were performed. The signal show clear, almost sinusoidal  
339 amplitudes in a frequency of around 15 Hz. None of the acceleration sensors we tested  
340 could reproduce such clear signals directly from the muscle belly or the tendon during  
341 isometric action.

342 **Fig 6.** Comparison of the original MTG-signal of the triceps brachii tendon measured  
in vivo (black) to the corresponding recorded audio signal using the technical setting  
(ex vivo) (red).

343 However, not all piezoelectric sensors are suitable for the use of MMG or MTG.  
344 We presented here the – in our experience – most appropriate ones. However, we already  
345 had a new batch of the Shadow SH 4001 sensor, which have changed in quality. Therefore,  
346 we switched to the Shadow SH-SV1, which proofed to be suitable. There are other  
347 pickups, which turned out to be suitable with regard to the SNR. However, the one we  
348 tested had a larger diameter and, therefore, turned out to be not as practicable for fixing  
349 onto the skin above the muscle belly or tendon. Beside the choice of a suitable  
350 piezoelectric sensor, an essential factor is the used amplifier. As mentioned in the method  
351 setting, for MMG and MTG there is the need of an amplifier, which is capable to amplify  
352 low frequency ranges, too. Since the Nobels preamp booster pre-1 turned out to be  
353 suitable and reveals extremely clear signals, they are used in our investigations.

### 354 **Comparison of repeated audio trials to MTG trials in vivo**

355 The piezoelectric sensor was already used in several studies in vivo for  
356 mechanotendography. In a study, the coherence of MMG and MTG-signals of the triceps  
357 brachii muscle and its tendon was investigated during muscular action of one person and

358 muscular interaction between two persons (close to arm wrestling) during 80% of the  
359 MVIC [3]. Thereby it was shown that the MMG-/MTG-signal pairs of one measurement  
360 develop high coherence between the muscle and tendon of one person and also between  
361 two interacting persons. This was evaluated by wavelet coherence analysis. In contrast,  
362 random matched pairs did show significantly lower coherence [3]. In case the system  
363 would produce random, distorted or noisy signals, a result like this would not appear. This  
364 also indicates that the used piezo-based measurement system is a valuable and valid tool  
365 to measure tendinous and muscular oscillations in vivo.

366 The comparison of the here presented reliability results in the technical setting to  
367 measures of a recently conducted study in patients with Achillodynia [30] could lead to  
368 further assumptions. The MTG of the Achilles tendon was measured during an impact on  
369 the forefoot from plantar in direction of dorsiflexion during one leg stance (5 trials).  
370 Patients with Achillodynia ( $n = 10$ ) showed a significantly higher mean spearman rank  
371 correlation (MCC) and a significantly lower averaged mean distance (MD) between the  
372 curves of five trials compared to healthy controls ( $n = 10$ ) [30]. The MD amounted to  $0.128$   
373  $\pm 0.029$  V in patients and  $0.227 \pm 0.118$  V in healthy controls ( $p = 0.028$ ) and the MCC was  
374  $0.845 \pm 0.073$  compared to  $0.451 \pm 0.392$  in healthy controls ( $p = 0.011$ ). For the present  
375 reliability investigation, exemplarily signals from those investigations were converted into  
376 audio signals and were recorded. In comparing the results, it is even more indicated that  
377 the oscillations of an affected Achilles tendon after impact during repeated trials in vivo  
378 behave similarly compared to the repetition trials ex vivo recording the same audio file  
379 (MCC: Achillodynia (in vivo):  $0.85 \pm 0.07$  vs. repeated audioMTGAchilles trials (ex vivo):

380  $0.88 \pm 0.13$ ; MD: Achillodynia:  $0.13 \pm 0.03$  vs. audioMTGAchilles:  $0.02 \pm 0.03$ ). In contrast,  
381 the healthy subjects of the Achilles tendon study showed a higher variability indicated by  
382 a lower MCC and a higher MD. This behavior is rather comparable to the here presented  
383 random matched group (MCC: healthy Achilles tendon (in vivo):  $0.45 \pm 0.39$  vs. random  
384 audioMTGAchilles (ex vivo):  $0.15 \pm 0.10$ ; MD: healthy Achilles tendon:  $0.23 \pm 0.12$  V vs.  
385 random audioMTGAchilles:  $0.19 \pm 0.01$  V). This comparison between MTG-signals of the  
386 Achilles tendon in vivo and the recordings of the audio MTGAchilles-signals ex vivo  
387 indicate that immediately after an impact a healthy preloaded Achilles tendon oscillates  
388 in a more variable way, which tends to behave like random matched trials. Affected  
389 Achilles tendons (achillodynia) oscillate in a way, which rather matches the behavior of  
390 repeatedly recorded similar audio-signals of MTGAchilles, which show excellent  
391 reliability. It is assumed, therefore, that the higher variation in healthy controls is due to  
392 a necessary biological variability, which obviously plays an important role in healthy  
393 neuromuscular systems.

394         Because of their natural variability, biological systems will never produce identical  
395 wave patterns. Therefore, the validation of the reliability of such systems in vivo is limited.  
396 However, the high reproducibility of the tendinous oscillations in patients with  
397 achillodynia indicates that the piezo-based measurement system is not only suitable to  
398 capture the oscillations of audios in the here presented technical setting in a reproducible  
399 way, but also are able to monitor the oscillations of muscle and tendon oscillations  
400 reliably.

401 **Tendinous oscillations as possible insight into motor control**

402           It is suggested that the mechanical oscillations captured superficially by the  
403 piezoelectric sensors reflects the motion of tendons. This is supported by the  
404 investigations of [22], in which it was shown by real-time ultrasound that the motion of  
405 the Achilles tendon and the adjacent subcutaneous tissue were similar. Therefore, it is  
406 conceivable that the mechanical pressure waves, generated by those oscillations, can be  
407 captured by the piezoelectric sensors fixed on the skin. Tendons oscillate laterally and  
408 axially. The piezoelectric sensor is not able to display the axial motion due to the  
409 placement on the skin. However, using MTG, the mechanical pressure waves, which are  
410 produced by a three-dimensional motion, can be captured in the transversal plane.

411           A special feature regarding some tendons, e.g. the Achilles tendon or the tendon  
412 of the triceps brachii muscle, is that there is more than one head, which inserts into the  
413 tendon. Thus, there is not only one single muscle working, but e.g. the three heads of the  
414 respective muscle. The cooperation of those three oscillating actuators are still not  
415 uncovered completely. However, as shown in terms of isometric muscle activity,  
416 collaborating muscles and tendons can be synchronized by the neuromuscular system  
417 [3,28]. Thereby, short phases without synchronization are alternating with long phases of  
418 significant coherence. It is assumed that the three muscle heads should also be able to  
419 develop coherent behavior, which is supposed to be controlled by supraspinal motor  
420 areas. Since all of those muscle heads insert into one tendon, a superpositioning effect of  
421 the tendon is assumed for the Achilles or triceps brachii tendon. Measures of tendons,  
422 therefore, could reveal further insights into the quality of motor controlling processes  
423 and, in general, into motor control.

424           The Achilles tendon, e.g., is alternated tightened and released during walking. Due  
425 to the impacts of floor during heel strike and the contraction of the triceps surae muscle  
426 during push off, the sinew is tightened. The behavior of the tendinous string during and  
427 after this impact is influenced by the mentioned active drives of the muscles but also by  
428 its passive mechanical properties. The tension and length influences the resonance  
429 frequency like it is the case for a chord of a guitar. Thereby, the tendon function as band  
430 pass. Therefore, certain frequencies are suppressed and the surrounding soft tissues will  
431 have a vibration damping effect. It is therefore assumed that the oscillations of tendons  
432 not simply reflect muscular vibrations, but the behavior is highly influenced by the tension  
433 and the vibrations of their driving muscles. It is supposed that if the motor control is  
434 restricted, changes in the mechanical oscillating behavior of tendons might reflect them  
435 and, therefore, investigating those mechanical tendinous oscillations might provide a  
436 more functional insight into the properties of tendons. Hence, the non-invasive and easy  
437 applicable method of mechanotendography could be a promising option to be applied in  
438 further studies investigating the musculoskeletal-system to enlarge the knowledge of the  
439 behavior of those relevant bodily structures in healthy and diseased persons and to  
440 examine this promising tool for probable applications in diagnostics.

## 441 **Conclusion**

442           The repetition trials showed that the used piezo-based measurement system is  
443 suited to measure mechanical oscillations reproducibly. It is concluded that the MTG is a  
444 reliable and valid tool to measure tendinous oscillations. It seems reasonably transferable  
445 to muscular oscillations (mechanomyography).

446           The methods of mechanotendography and mechanomyography open up  
447 possibilities to get insights into the tendinous and motor output, which might reflect the  
448 functionality of the neuromuscular system and control. Therefore, the application of this  
449 innovative, non-invasive, easy applicable method in further studies dealing with the  
450 neuromuscular system is suggested as one practicable approach. It might lead to  
451 additional knowledge of pathomechanism and might help in diagnosing impairments of  
452 the neuromuscular system and motor control. Further studies should focus and the  
453 connection between oscillatory pattern and tensile structure.

454

#### 455 **COPYRIGHT REMINDER**

456 All figures, including the pictures, were made in the Neuromechanics laboratory of the  
457 University of Potsdam. Therefore, no copyright permission has to be obtained from  
458 other sources.

459

#### 460 **ACKNOWLEDGMENT**

461

462 Not applicable.

#### 463 **Authors contributions**

464 LVS and FNB designed the study. LVS performed the measurements, data processing,  
465 analysis and drafted the manuscript. Both authors reviewed the manuscript critically.

#### 466 **FUNDING**

467 No funding applicable.

#### 468 **NOMENCLATURE**

469

CA           Cronbach's alpha

|            |                                       |
|------------|---------------------------------------|
| <i>CV</i>  | Coefficient of variation              |
| <i>ECG</i> | Electrocardiography                   |
| <i>EMG</i> | Electromyography                      |
| <i>ICC</i> | Intra class correlation coefficient   |
| <i>M</i>   | Mean                                  |
| <i>MCC</i> | Mean spearman correlation coefficient |
| <i>MD</i>  | Mean distances                        |
| <i>MMG</i> | Mechanomyography                      |
| <i>MTG</i> | Mechanotendography                    |
| <i>MVC</i> | Maximal voluntary contraction         |
| <i>NI</i>  | National Instruments                  |
| <i>SD</i>  | Standard deviation                    |
| <i>SNR</i> | Signal to noise ratio                 |

470

## 471 REFERENCES

472

473 [1] Beck T. Applications of Mechanomyography for Examining Muscle Function. Editor Travis. W. Beck.  
474 2010. ISBN 978-81-7895-449-3

475 [2] McAuley JH, Marsden CD. Physiological and pathological tremors and rhythmic central motor control.  
476 Brain. 2000; 123: 1545-1567. <https://doi.org/10.1093/brain/123.8.1545>

477 [3] Schaefer L, Bittmann F. Coherent behavior of neuromuscular oscillations between isometrically  
478 interacting subjects: experimental study utilizing wavelet coherence analysis of mechanomyographic  
479 and mechanotendographic signals. Scientific Reports. 2018; 8: 15456. DOI:10.1038/s41598-018-33579-  
480 5. <https://rdcu.be/9wm2>

481 [4] Magnusson SP, Hansen P, Kjær M. Tendon properties in relation to muscular activity and physical  
482 training. Scandinavian Journal of Medicine & Science in Sports. 2003; 13: 211-223. doi:[10.1034/j.1600-  
483 0838.2003.00308.x](https://doi.org/10.1034/j.1600-0838.2003.00308.x)

484 [5] Hirschmüller A. Achillodynie: Pathophysiologie und Diagnostik. Manuelle Therapie. 2014; 18: 107-112.  
485 DOI 10.1055/s-0034-1383426

486 [6] Alfredson H, Lorentzon R. Chronic Achilles tendinosis. Sports Med. 2000; 29(2): 135-146.  
487 <https://doi.org/10.2165/00007256-200029020-00005>.

488 [7] Wyndow N, Cowan SM, Wrigley TV, Crossley KM. Neuromotor Control of the Lower Limb in Achilles  
489 tendinopathy. Sports Medicine. 2010; 40(9): 715-727. Doi: 0112-1642/10/0009-0715.

490 [8] Quigley AS, Bancelin S, Deska-Gauthier D, Légaré F, Kreplak L, Veres SP. In tendons, differing  
491 physiological requirements lead to functionally distinct nanostructures. Scientific Reports. 2018; 8:  
492 4409. DOI: 10.1038/s41598-018-22741-8

493 [9] Shoaib M, Cheong J, Park D, Park C. Composite Controller for Antagonistic Tendon Driven Joints With  
494 Elastic Tendons and Its Experimental Verification. IEEE Access, Special section on advanced modeling  
495 and control of complex mechatronic systems with nonlinearity and uncertainty. 2018; 6: 5215-5226.  
496 DOI: 10.1109/ACCESS.2017.2787839

497 [10] Chatjigeorgiou IK. Nonlinear dynamics of statically displaced tendons with non-conventional end  
498 conditions. Applied Mathematical Modelling. 2020; 81: 211-231.  
499 <https://doi.org/10.1016/j.apm.2019.12.027>

- 500 [11] Huang BK, Wong JH, Haghghi P, Wan L, Du J, Chang EY. Pectoralis major tendon and enthesis: anatomic,  
501 magnetic resonance imaging, ultrasonographic, and histologic investigation. *Journal of Shoulder and*  
502 *Elbow Surgery*. 2020; Forthcoming. <https://doi.org/10.1016/j.jse.2019.12.020>
- 503 [12] Martinoli C, Bianchi S, Dahmane M, Pugliese F, Bianchi-Zamorani MP, Valle M. Ultrasound of tendons  
504 and nerves. *Eur Radiol*. 2002; 12: 44–55. DOI 10.1007/s00330-001-1161-9
- 505 [13] Maganaris CN, Narici MV, Almekinders LC et al. Biomechanics and Pathophysiology of Overuse Tendon  
506 Injuries. *Sports Med*. 2004; 34: 1005–1017. <https://doi.org/10.2165/00007256-200434140-00005>
- 507 [14] Kongsgaard M, Nielsen CH, Hegsvad S, Aagaard P, Magnusson SP. Mechanical properties of the human  
508 Achilles tendon, in vivo. *Clinical Biomechanics*. 2011; 26: 772-77.  
509 <https://doi.org/10.1016/j.clinbiomech.2011.02.011>
- 510 [15] Magnusson SP, Aagaard P, Rosager S, Dyhre-Poulsen P, Kjaer M. Load-displacement properties of the  
511 human triceps surae aponeurosis in vivo. *The Journal of Physiology*. 2001; 531: 277-288.  
512 doi:[10.1111/j.1469-7793.2001.0277j.x](https://doi.org/10.1111/j.1469-7793.2001.0277j.x)
- 513 [16] Bojsen-Møller J, Magnusson SP. Heterogeneous Loading of the Human Achilles Tendon In Vivo. *Exercise*  
514 *and Sport Sciences Reviews*. 2015; 43(4): 190-7 doi: 10.1249/JES.0000000000000062
- 515 [17] Maganaris CN. Validity of procedures involved in ultrasound-based measurement of human  
516 plantarflexor tendon elongation on contraction. *Journal of Biomechanics*. 2005; 38(1): 9-13.  
517 <https://doi.org/10.1016/j.jbiomech.2004.03.024>
- 518 [18] McCrory JL, Martin DF, Lowery RB et al. Etiologic factors associated with Achilles tendinitis in runners.  
519 *Medicine & Science in Sports & Exercise*. 1999; 31(10): 1374. DOI: 10.1097/00005768-199910000-  
520 00003
- 521 [19] Mahieu NN, Witvrouw E, Stevens E, Van Tiggelen D, Roget P. Intrinsic risk factors for the development  
522 of Achilles tendon overuse injury – a prospective study. *The American Journal of Sports Medicine*. 2006;  
523 34(2): 226-35. DOI: 10.1177/0363546505279918
- 524 [20] Baur H, Divert C, Hirschi Müller A et al. Analysis of gait differences in healthy runners and runners with  
525 chronic Achilles tendon complaints. *Isokinet Exerc Sci*. 2004; 12(2): 111-6. DOI: 10.3233/IES-2004-0161
- 526 [21] Baur H, Müller S, Hirschi Müller A, Cassel M, Weber J, Mayer F. Comparison in lower leg neuromuscular  
527 activity between runners with unilateral mid-portion Achilles tendinopathy and healthy individuals.  
528 *Journal of Electromyography and Kinesiology*. 2011; 21(3): 499-505.  
529 <https://doi.org/10.1016/j.jelekin.2010.11.010>
- 530 [22] Martin JA, Brandon SCE, Keuler EM et al. Gauging force by tapping tendons. *Nature communications*.  
531 2018; 9: 1592. <https://doi.org/10.1038/s41467-018-03797-6>
- 532 [23] Keuler EM, Loegering IF, Martin JA, Roth JD, Thelen DG. Shear wave predictions of Achilles tendon  
533 loading during human walking. *Scientific Reports*. 2019; 9: 13419. [https://doi.org/10.1038/s41598-](https://doi.org/10.1038/s41598-019-49063-7)  
534 [019-49063-7](https://doi.org/10.1038/s41598-019-49063-7)
- 535 [24] Salman M. Non-invasive monitoring of Achille's tendon stiffness variations in-vivo using mechanical  
536 vibrations. *The Journal of the Acoustical Society of America*. 2015; 137: 2424.  
537 <https://doi.org/10.1121/1.4920844>
- 538 [25] Sakalauskaite R, Satkunskiene D. The foot arch and viscoelastic properties of plantar fascia and Achilles  
539 tendon. *Journal of vibroengineering*. 2012; 14(4): 1-10. ISSN 1392-8716
- 540 [26] Bercoff J, Tanter M, Fink M. Supersonic Shear Imaging: A New Technique for Soft Tissue Elasticity  
541 Mapping. *IEEE transactions on ultrasonics, ferroelectrics, and frequency control*. 2004; 51(4): 396-408.  
542 DOI: 10.1109/TUFFC.2004.1295425
- 543 [27] Schubert P. Die Anwendung nichtlinearer Verfahren zur Charakterisierung der menschlichen  
544 Variabilität aus Zeitreihen. *Deutsche Zeitschrift für Sportmedizin*. 2013; 64(5): 132-140. DOI:  
545 10.5960/dzsm.2012.064



- 546 [28] Schaefer LV, Torick AH, Matuschek H, Holschneider M, Bittmann FN. Synchronization of muscular  
547 oscillations between two subjects during isometric interaction. *Eur J Trans Myol.* 2014; 24(3): 195-202.  
548 DOI 10.4081/ejtm.2014.2237
- 549 [29] Torick A, Hoff M, Schaefer L, Behnke T, Lehmann D, Bittmann F. Mechanotendografie (MTG) – Messen  
550 und Analysieren der Oszillationsmuster von Achillessehnen“. Poster presentation at the 44th Congress  
551 of German Medicine 2013 in Frankfurt am Main, Germany. *Deutsche Zeitschrift für Sportmedizin.* 2013;  
552 64(7-8): 206.
- 553 [30] Schaefer L, Bittmann F. The preloaded Achilles tendon shows reduced variability of mechanical  
554 oscillations after impact in patients with Achilles tendinopathy compared to controls. *Eur J Trans Myol.*  
555 2020; 30(2): xx1-x11 (Forthcoming).
- 556 [31] Ko TK, Li MY. A Guideline of Selecting and Reporting Intraclass Correlation Coefficients for Reliability  
557 Research. *J Chiropr Med.* 2016; 15(2): 155–163. DOI: 10.1016/j.jcm.2016.02.012
- 558 [32] Alves N, Sejdic E, Sahota B, Chau T. The effect of accelerometer location on the classification of single-  
559 site forearm mechanomyograms. *BioMedical Engineering OnLine.* 2010; 9(23): 1-14. doi:  
560 10.1186/1475-925X-9-23

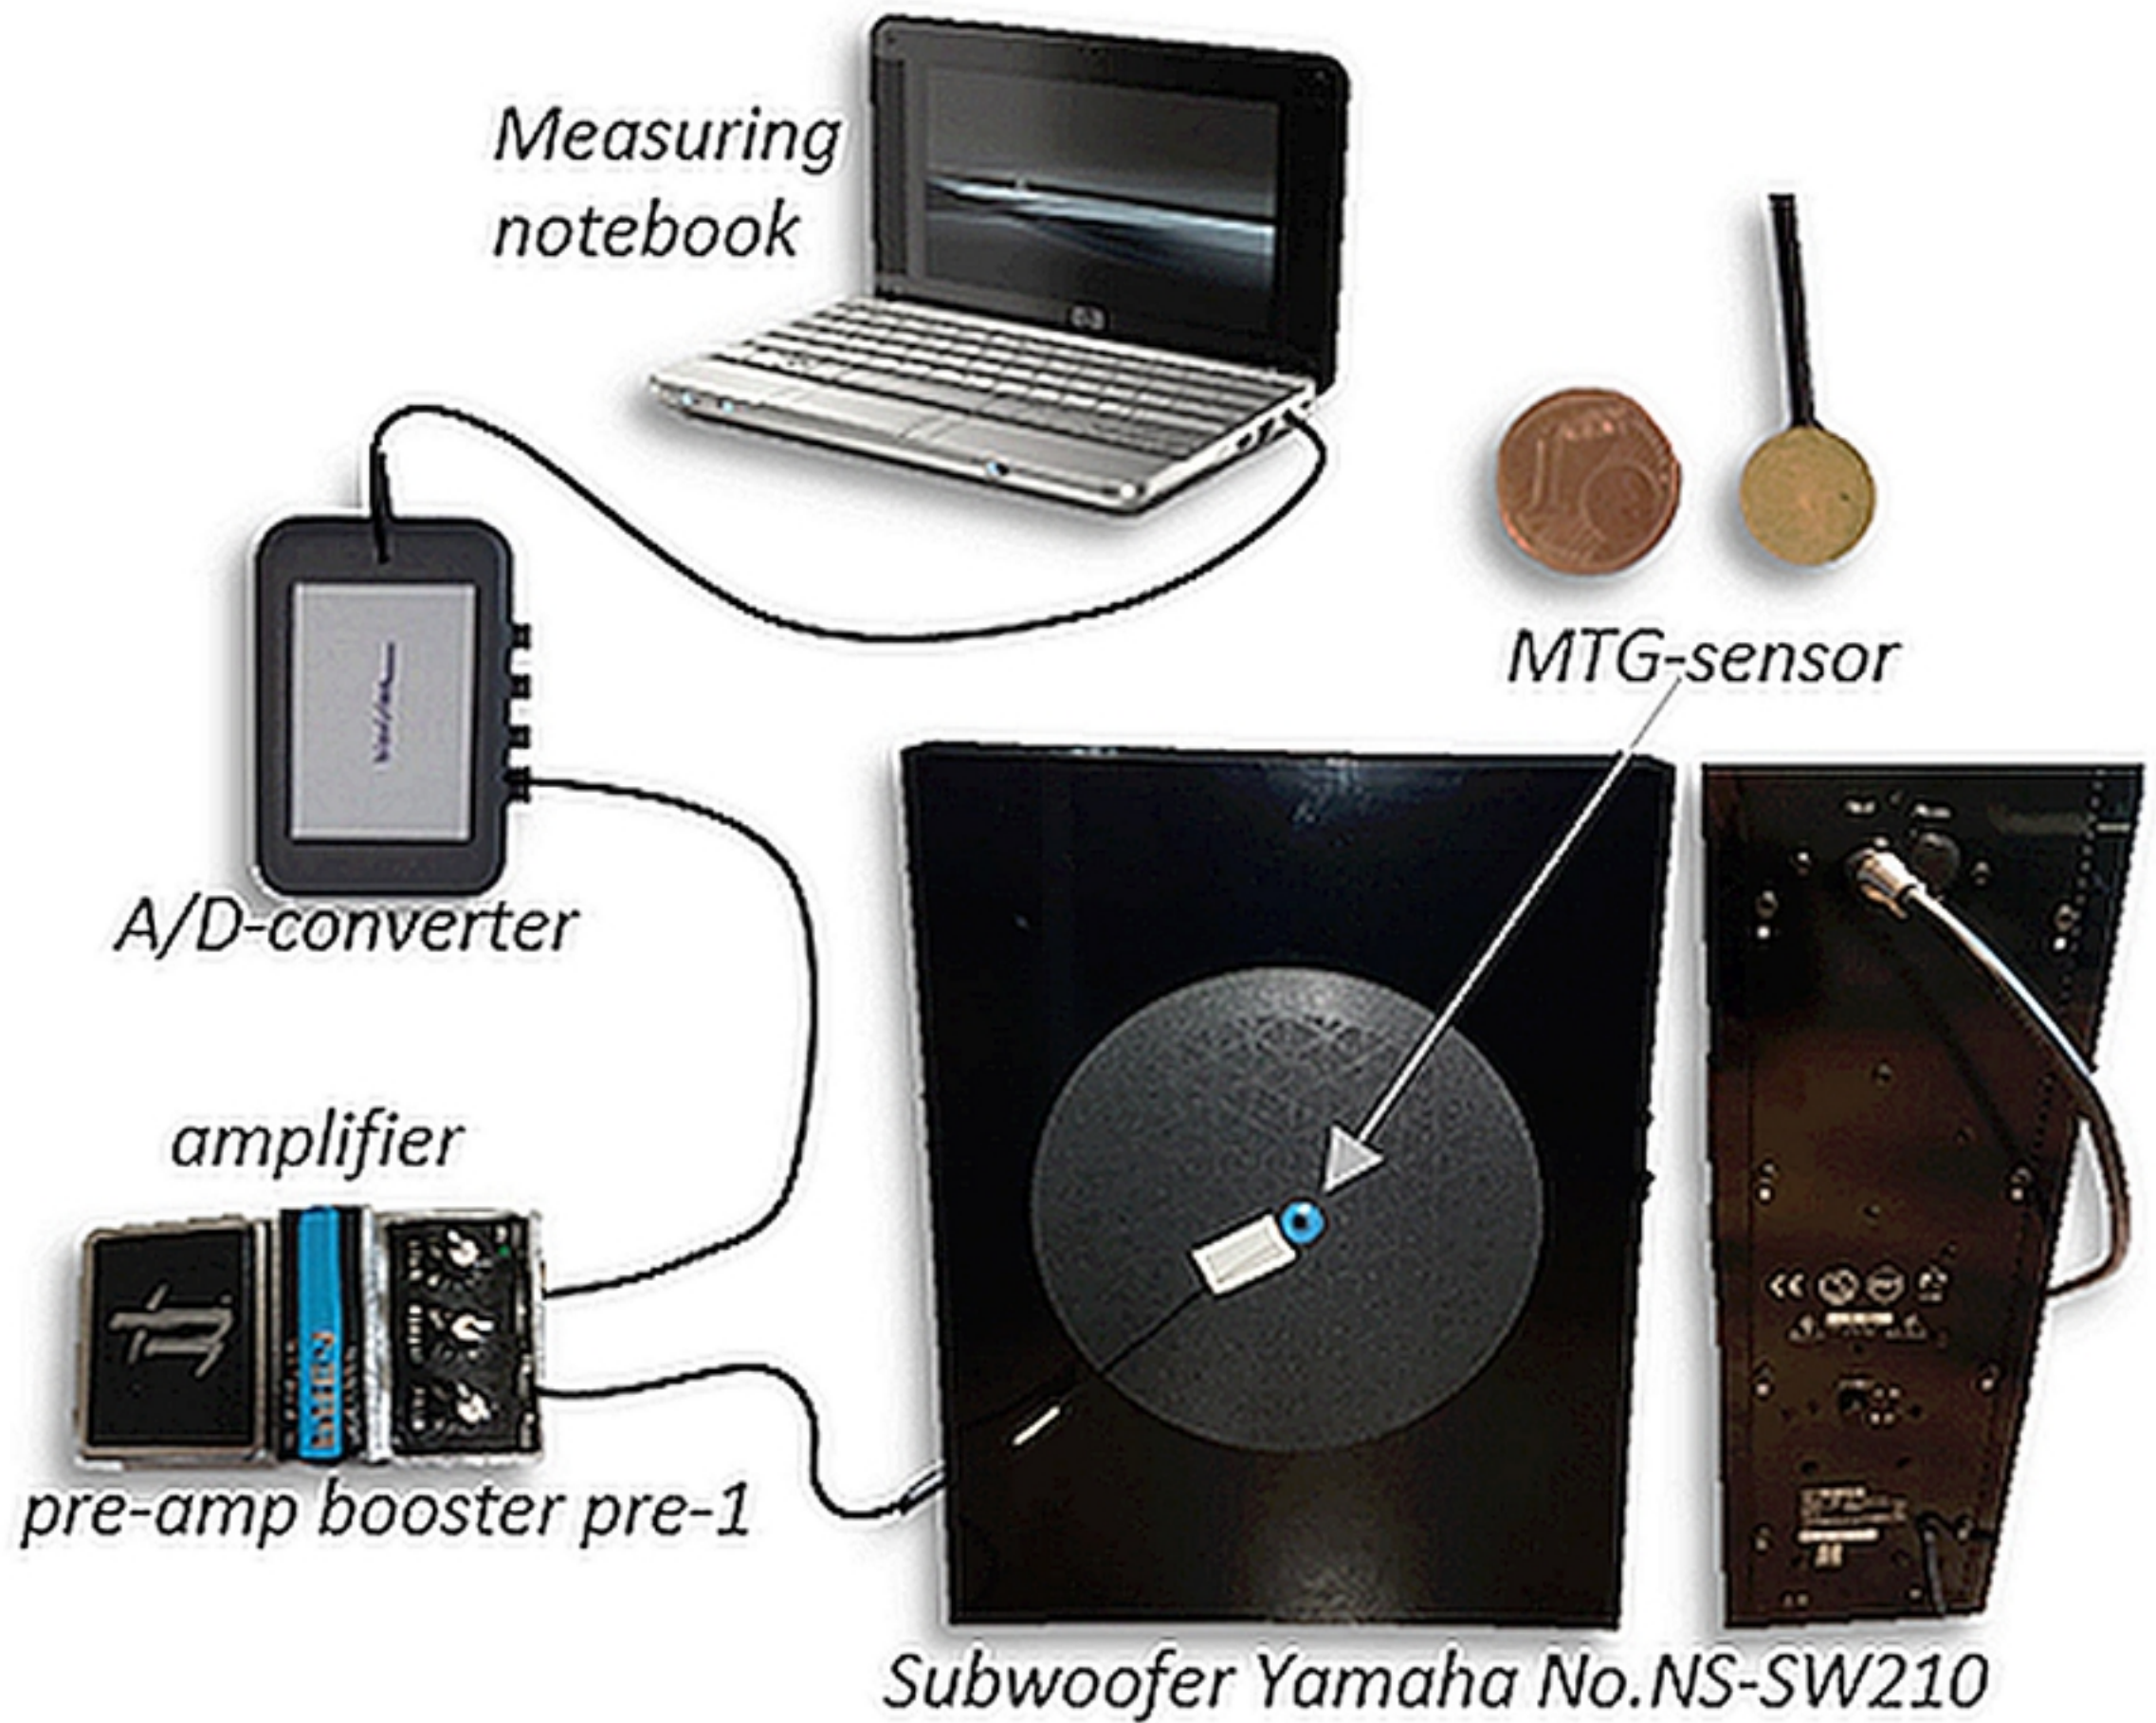

Figure 1

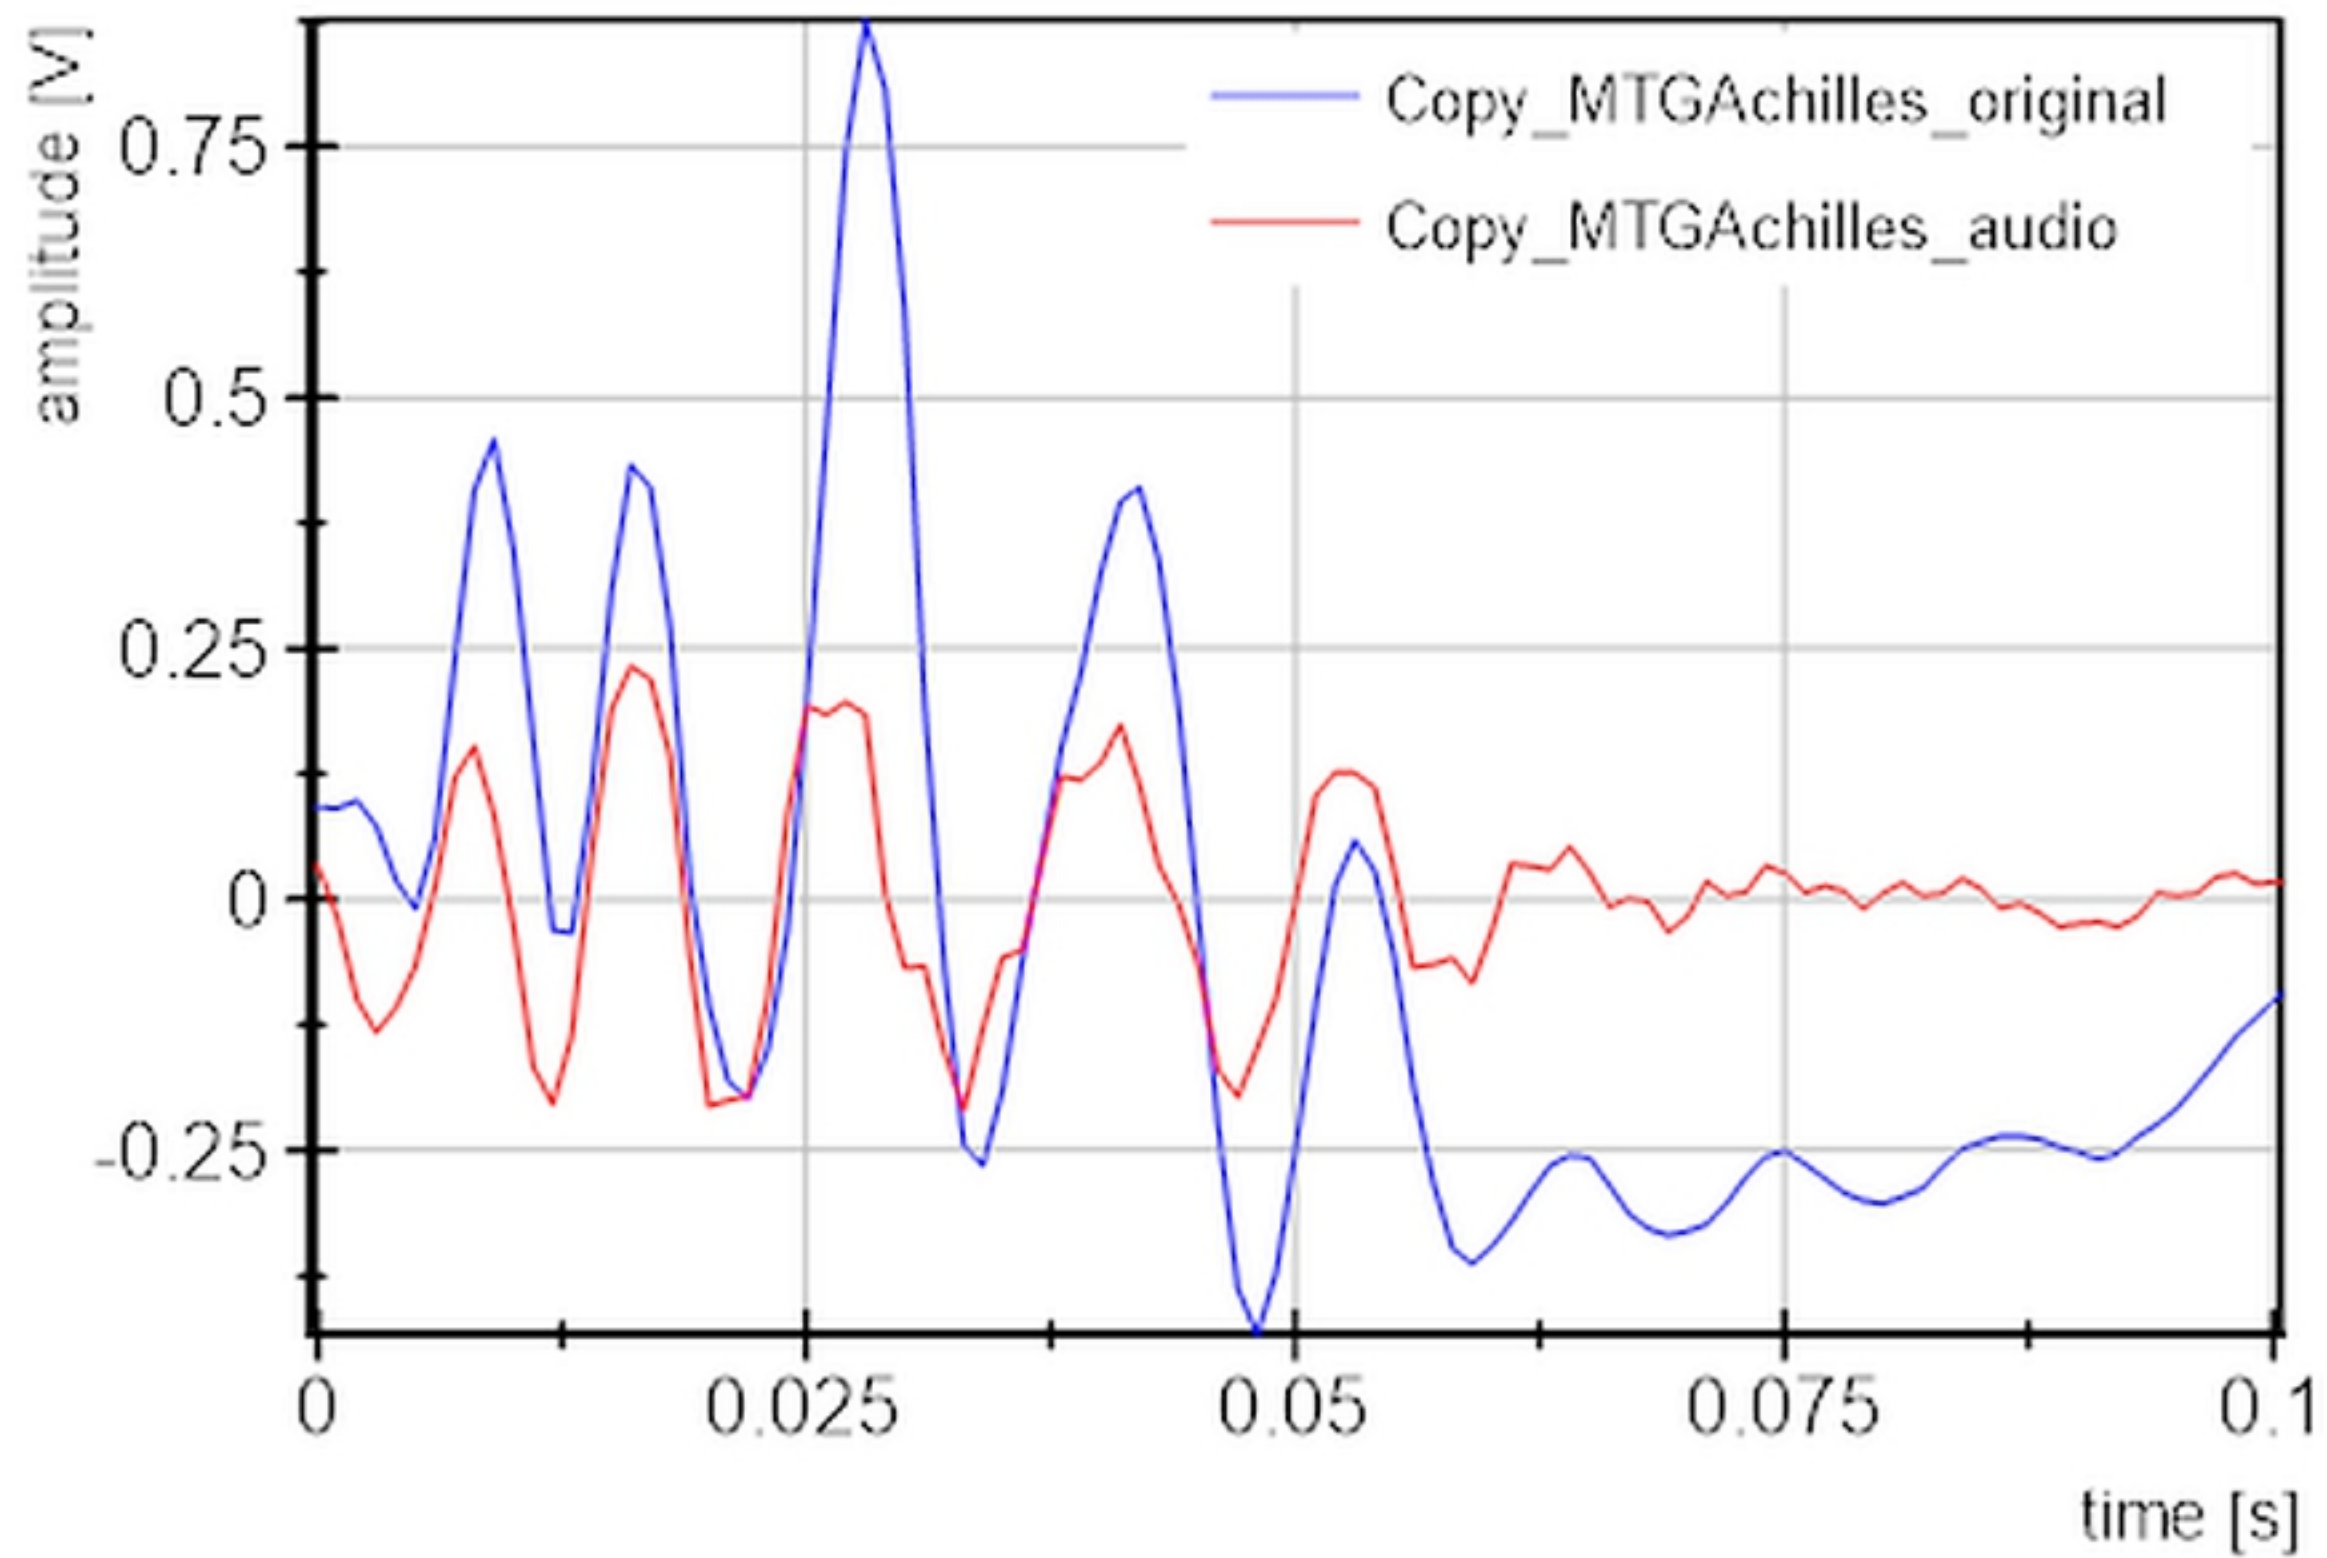

Figure 2

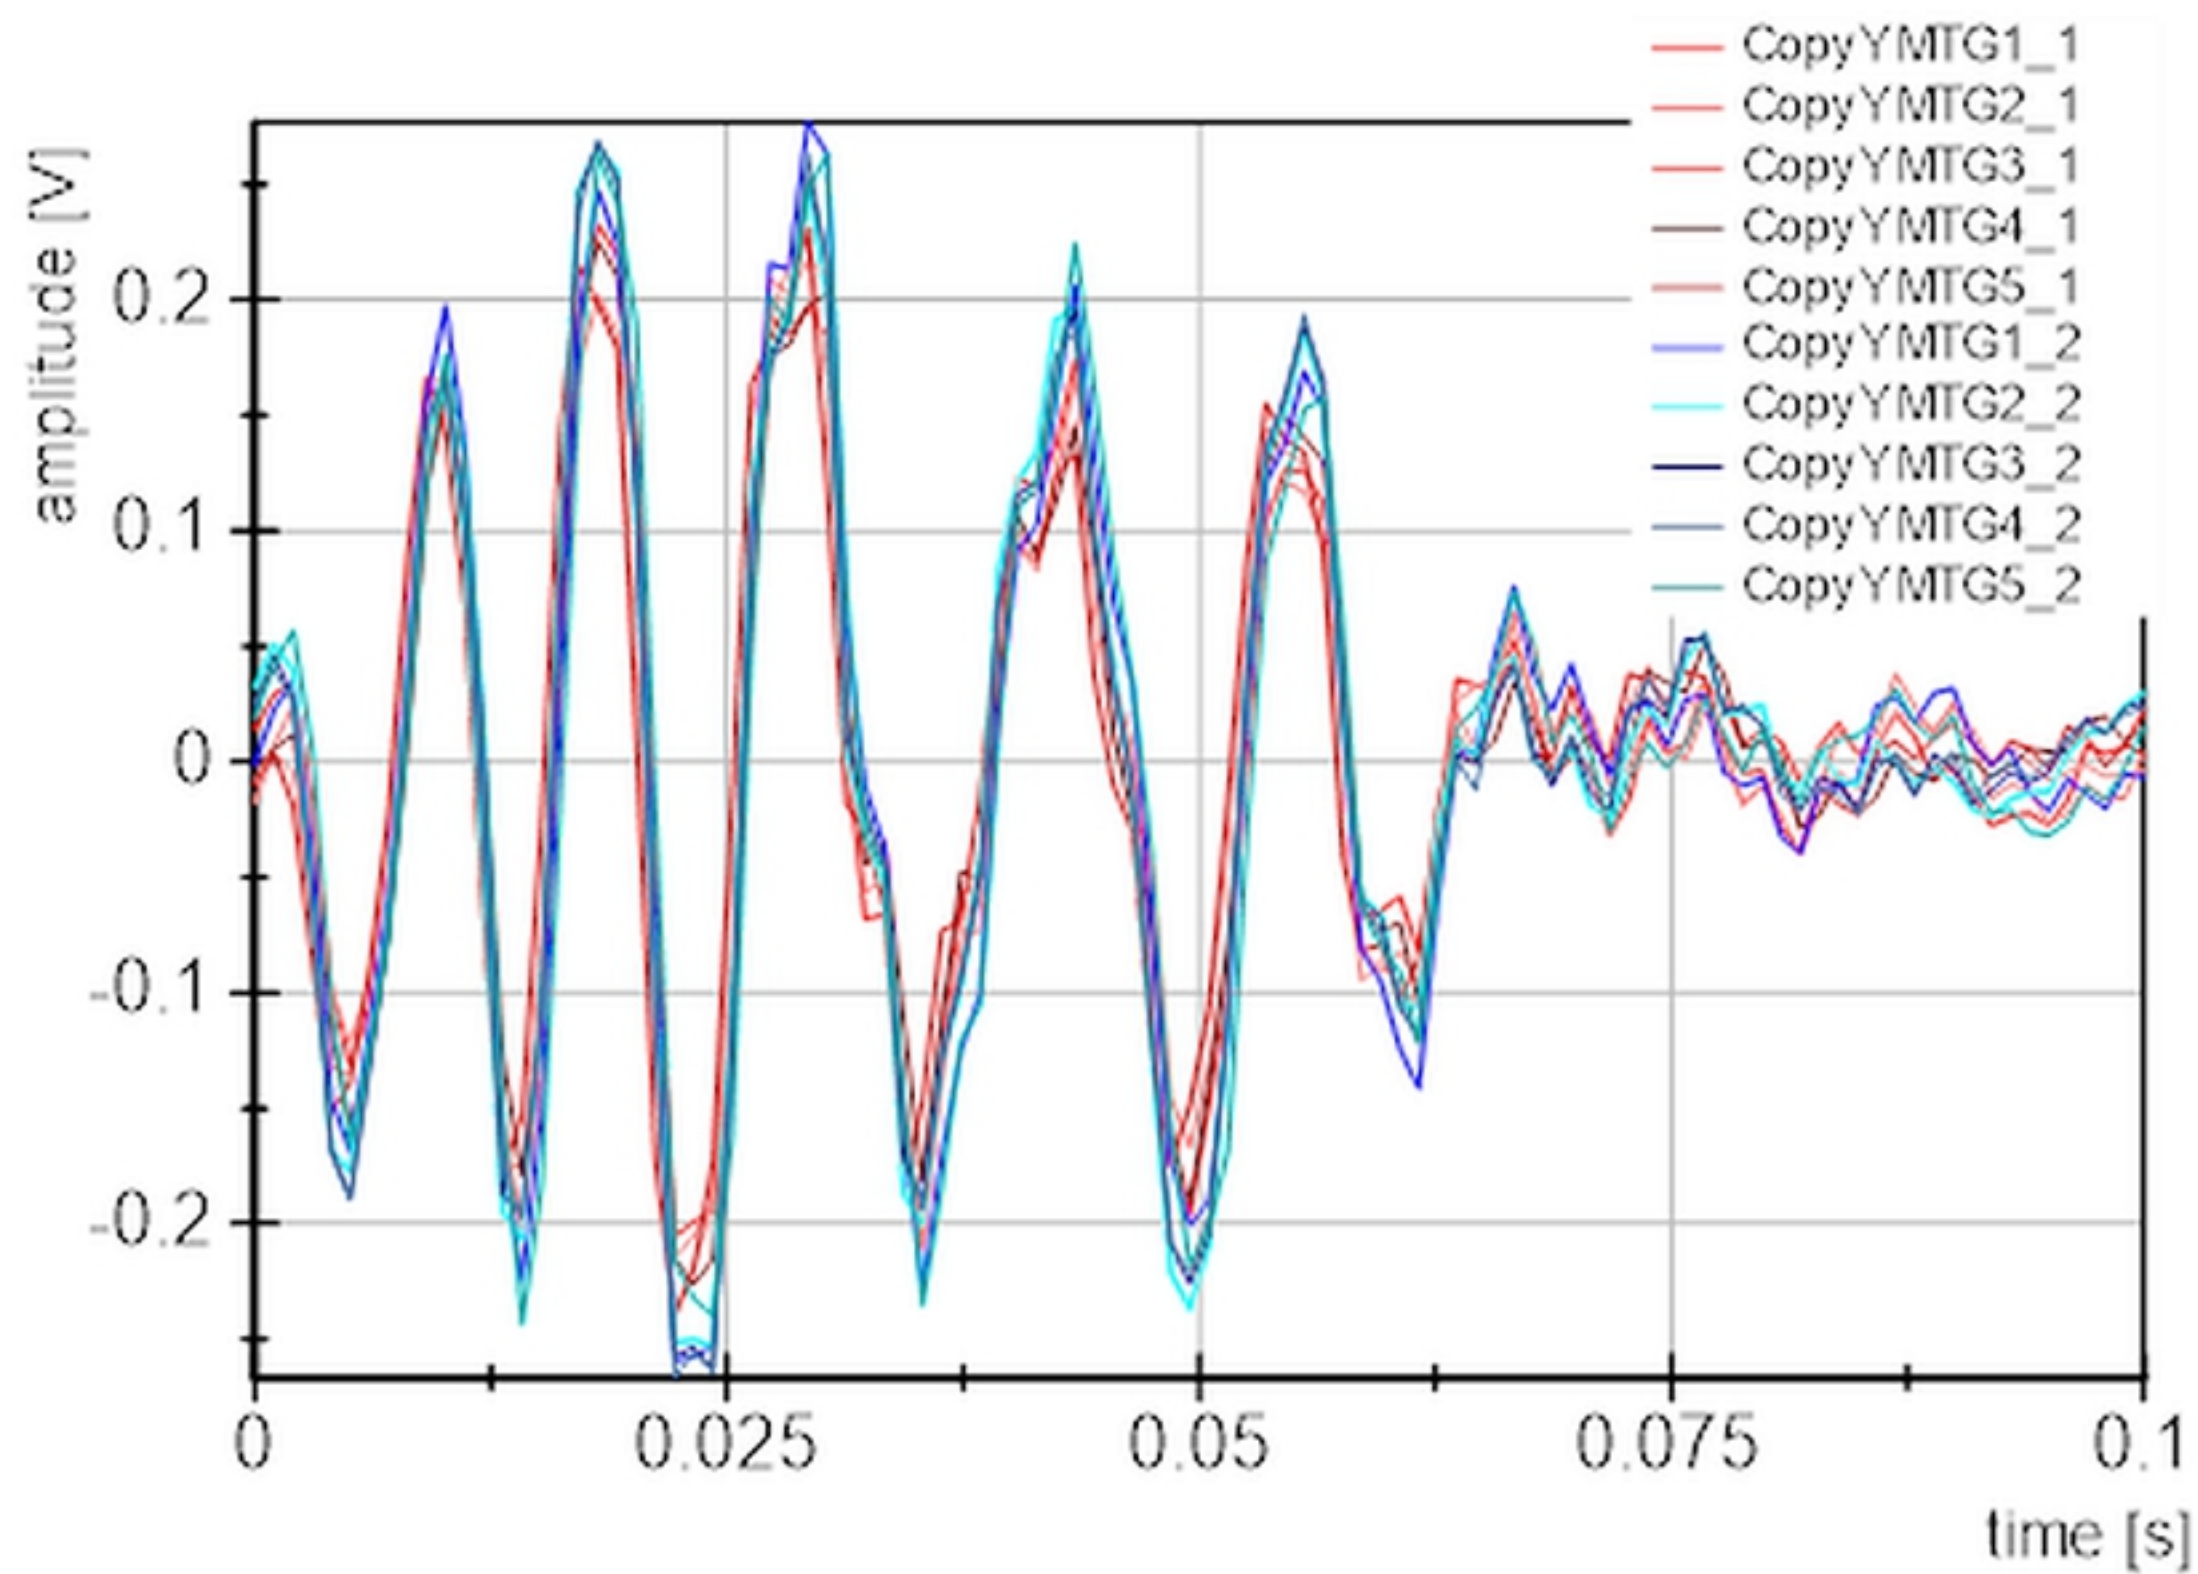

Figure 4

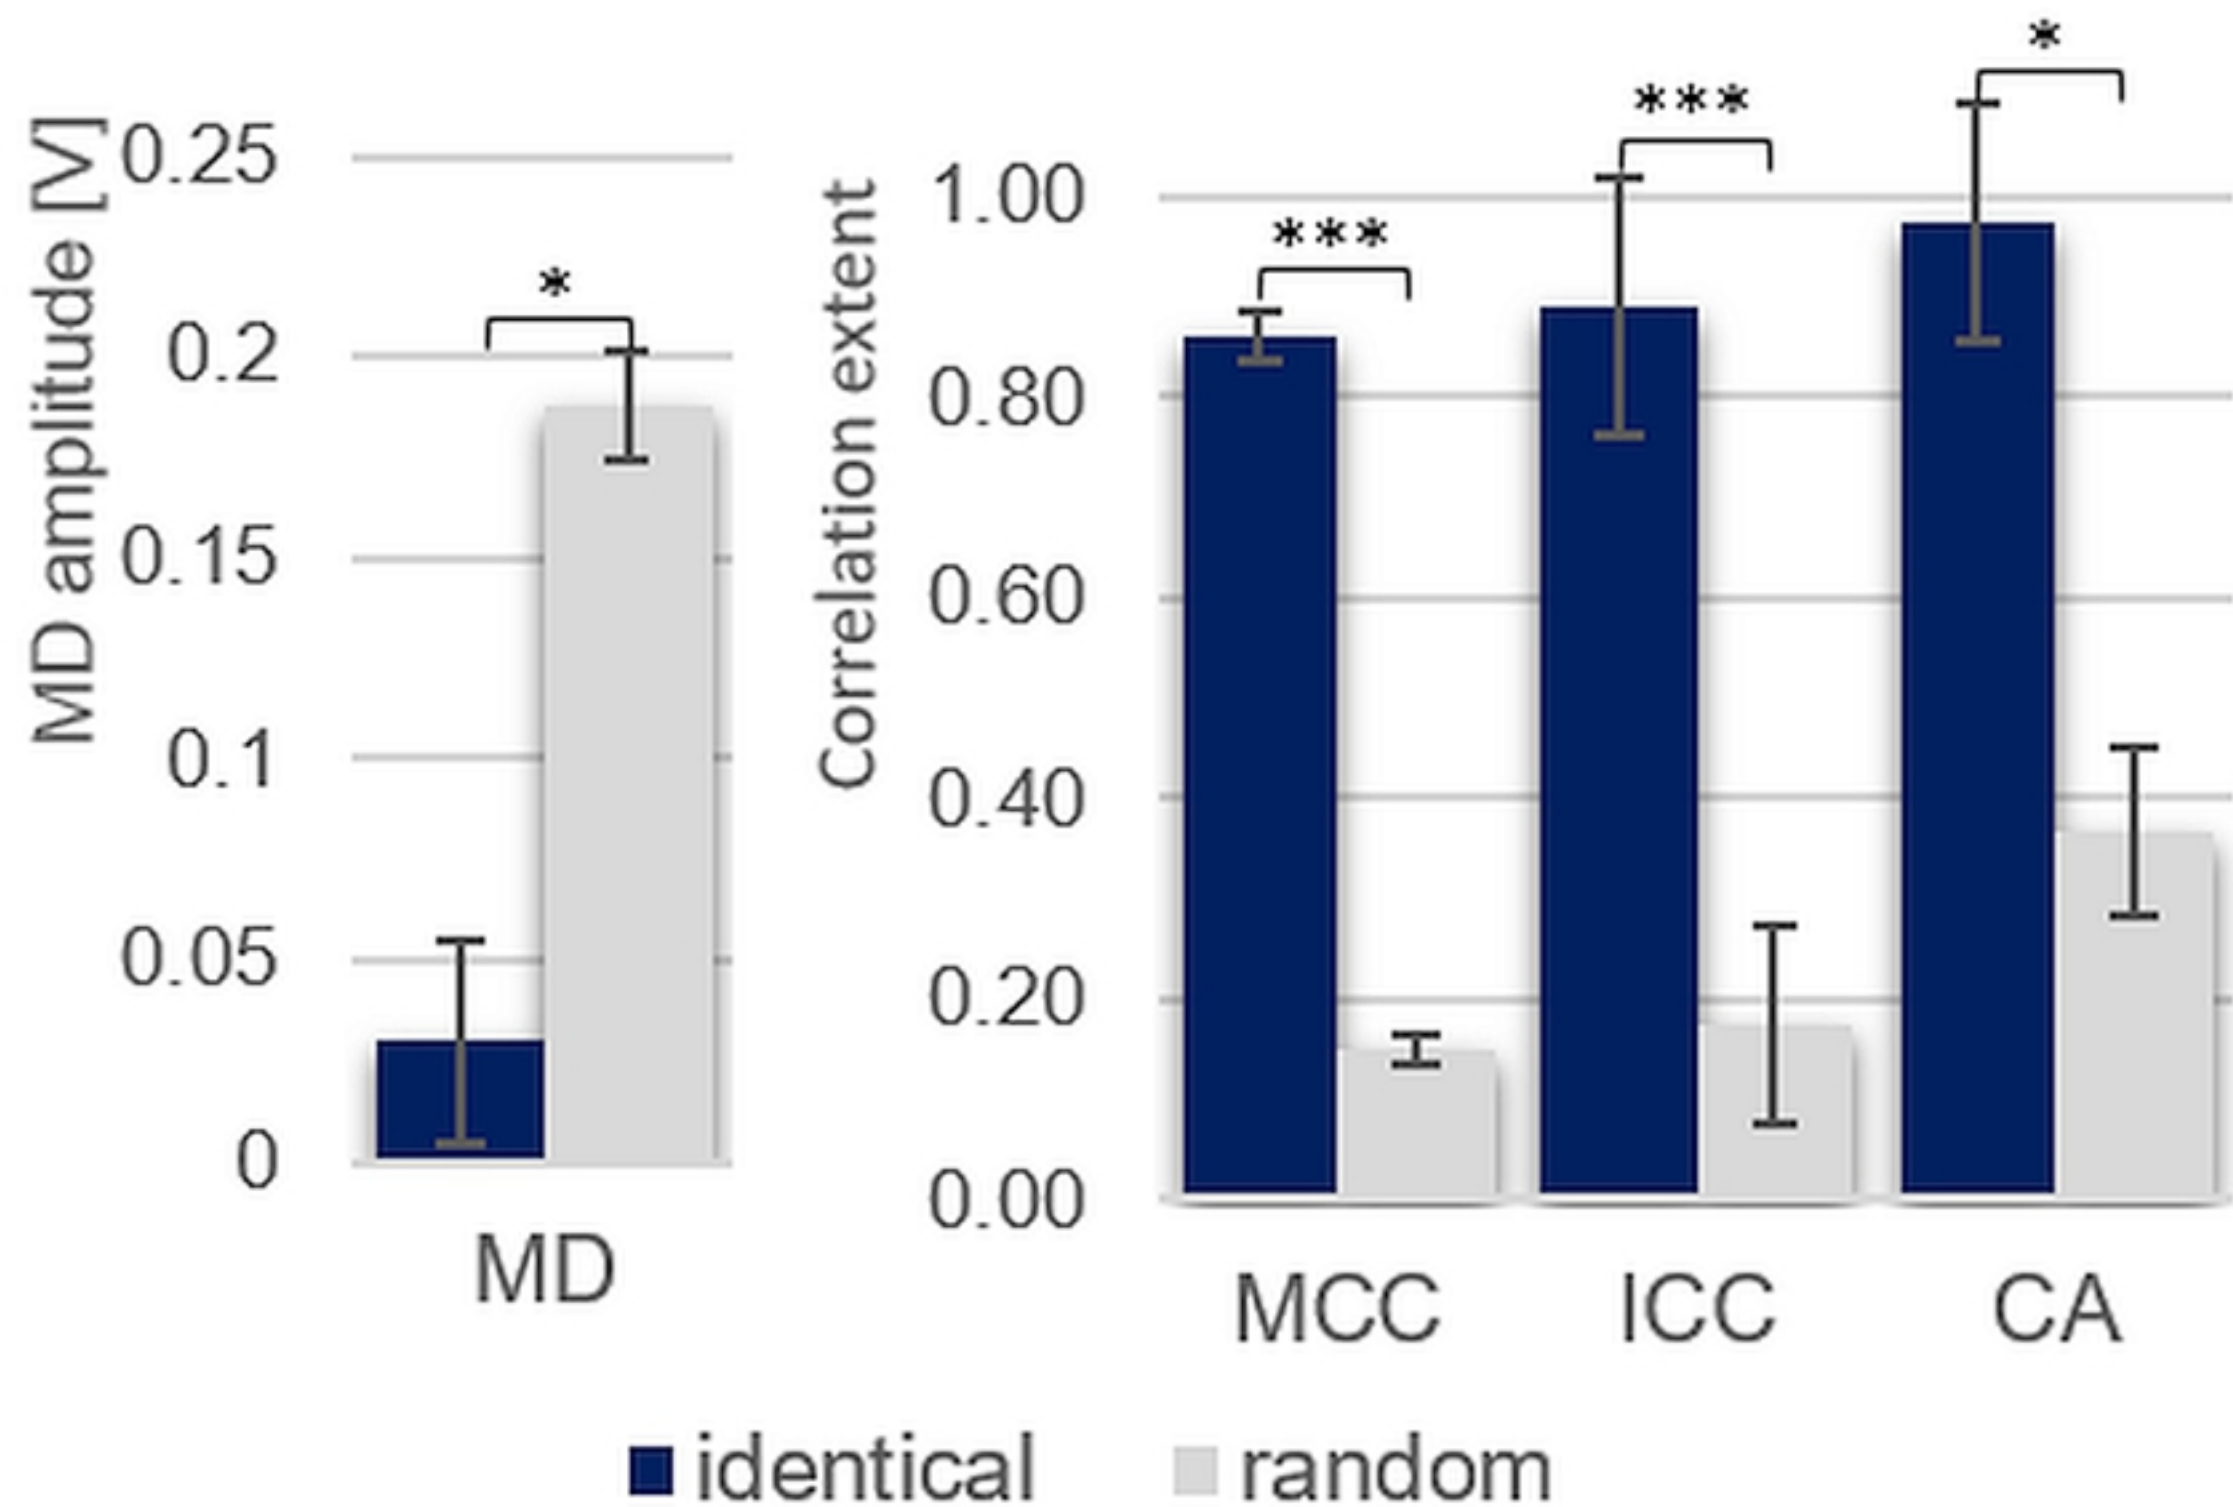

Figure 5

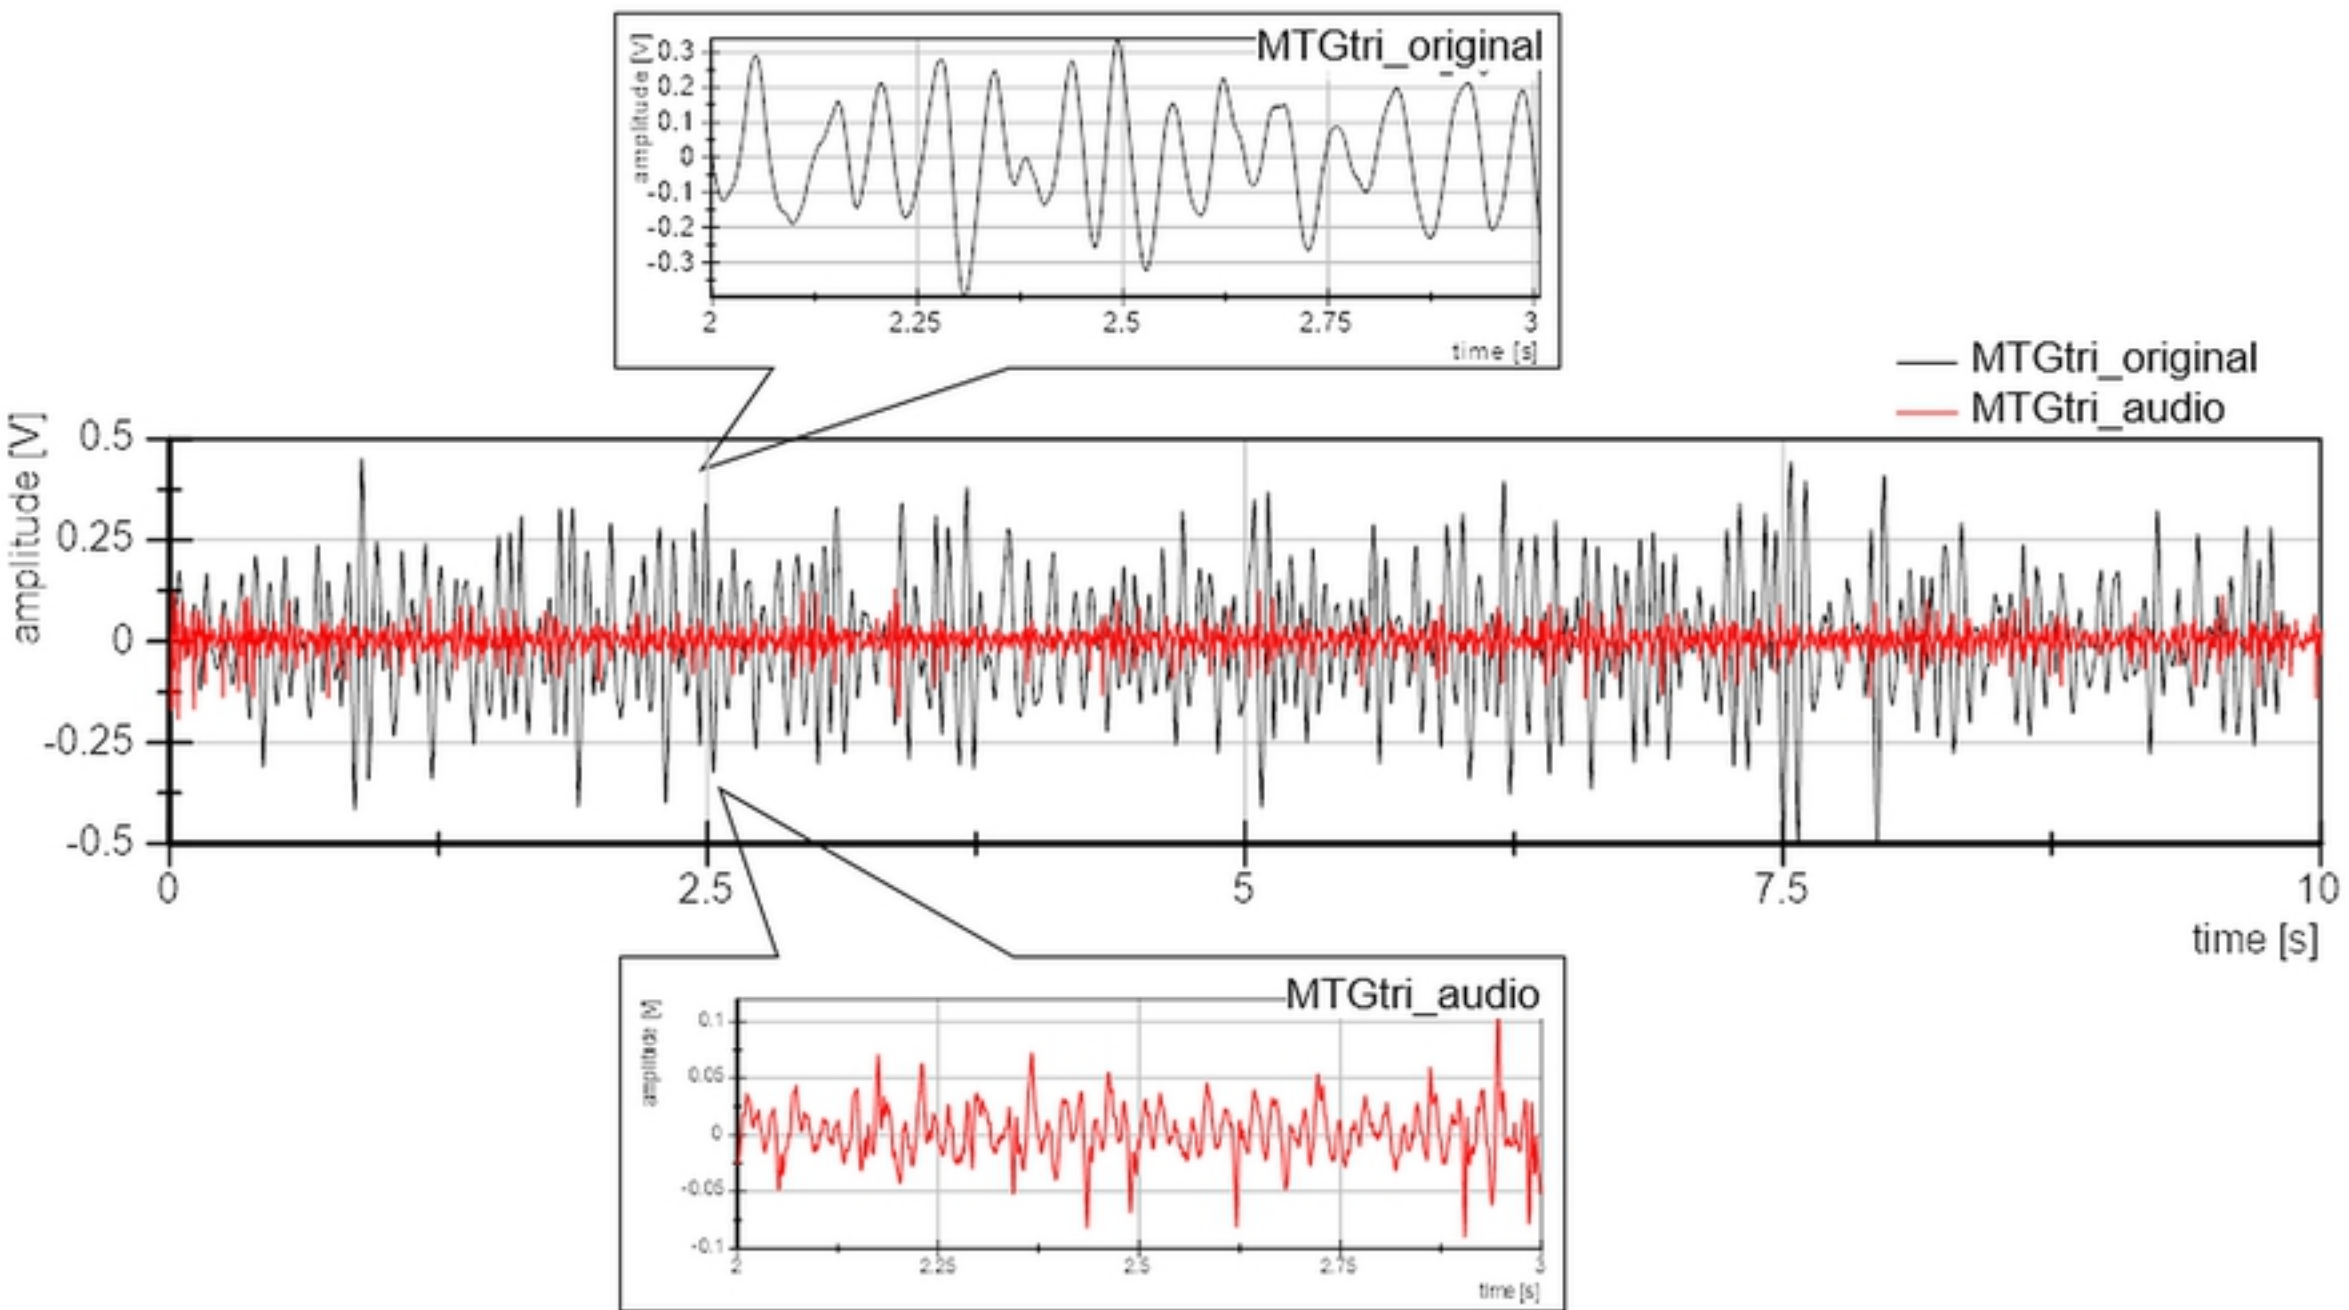

Figure 6

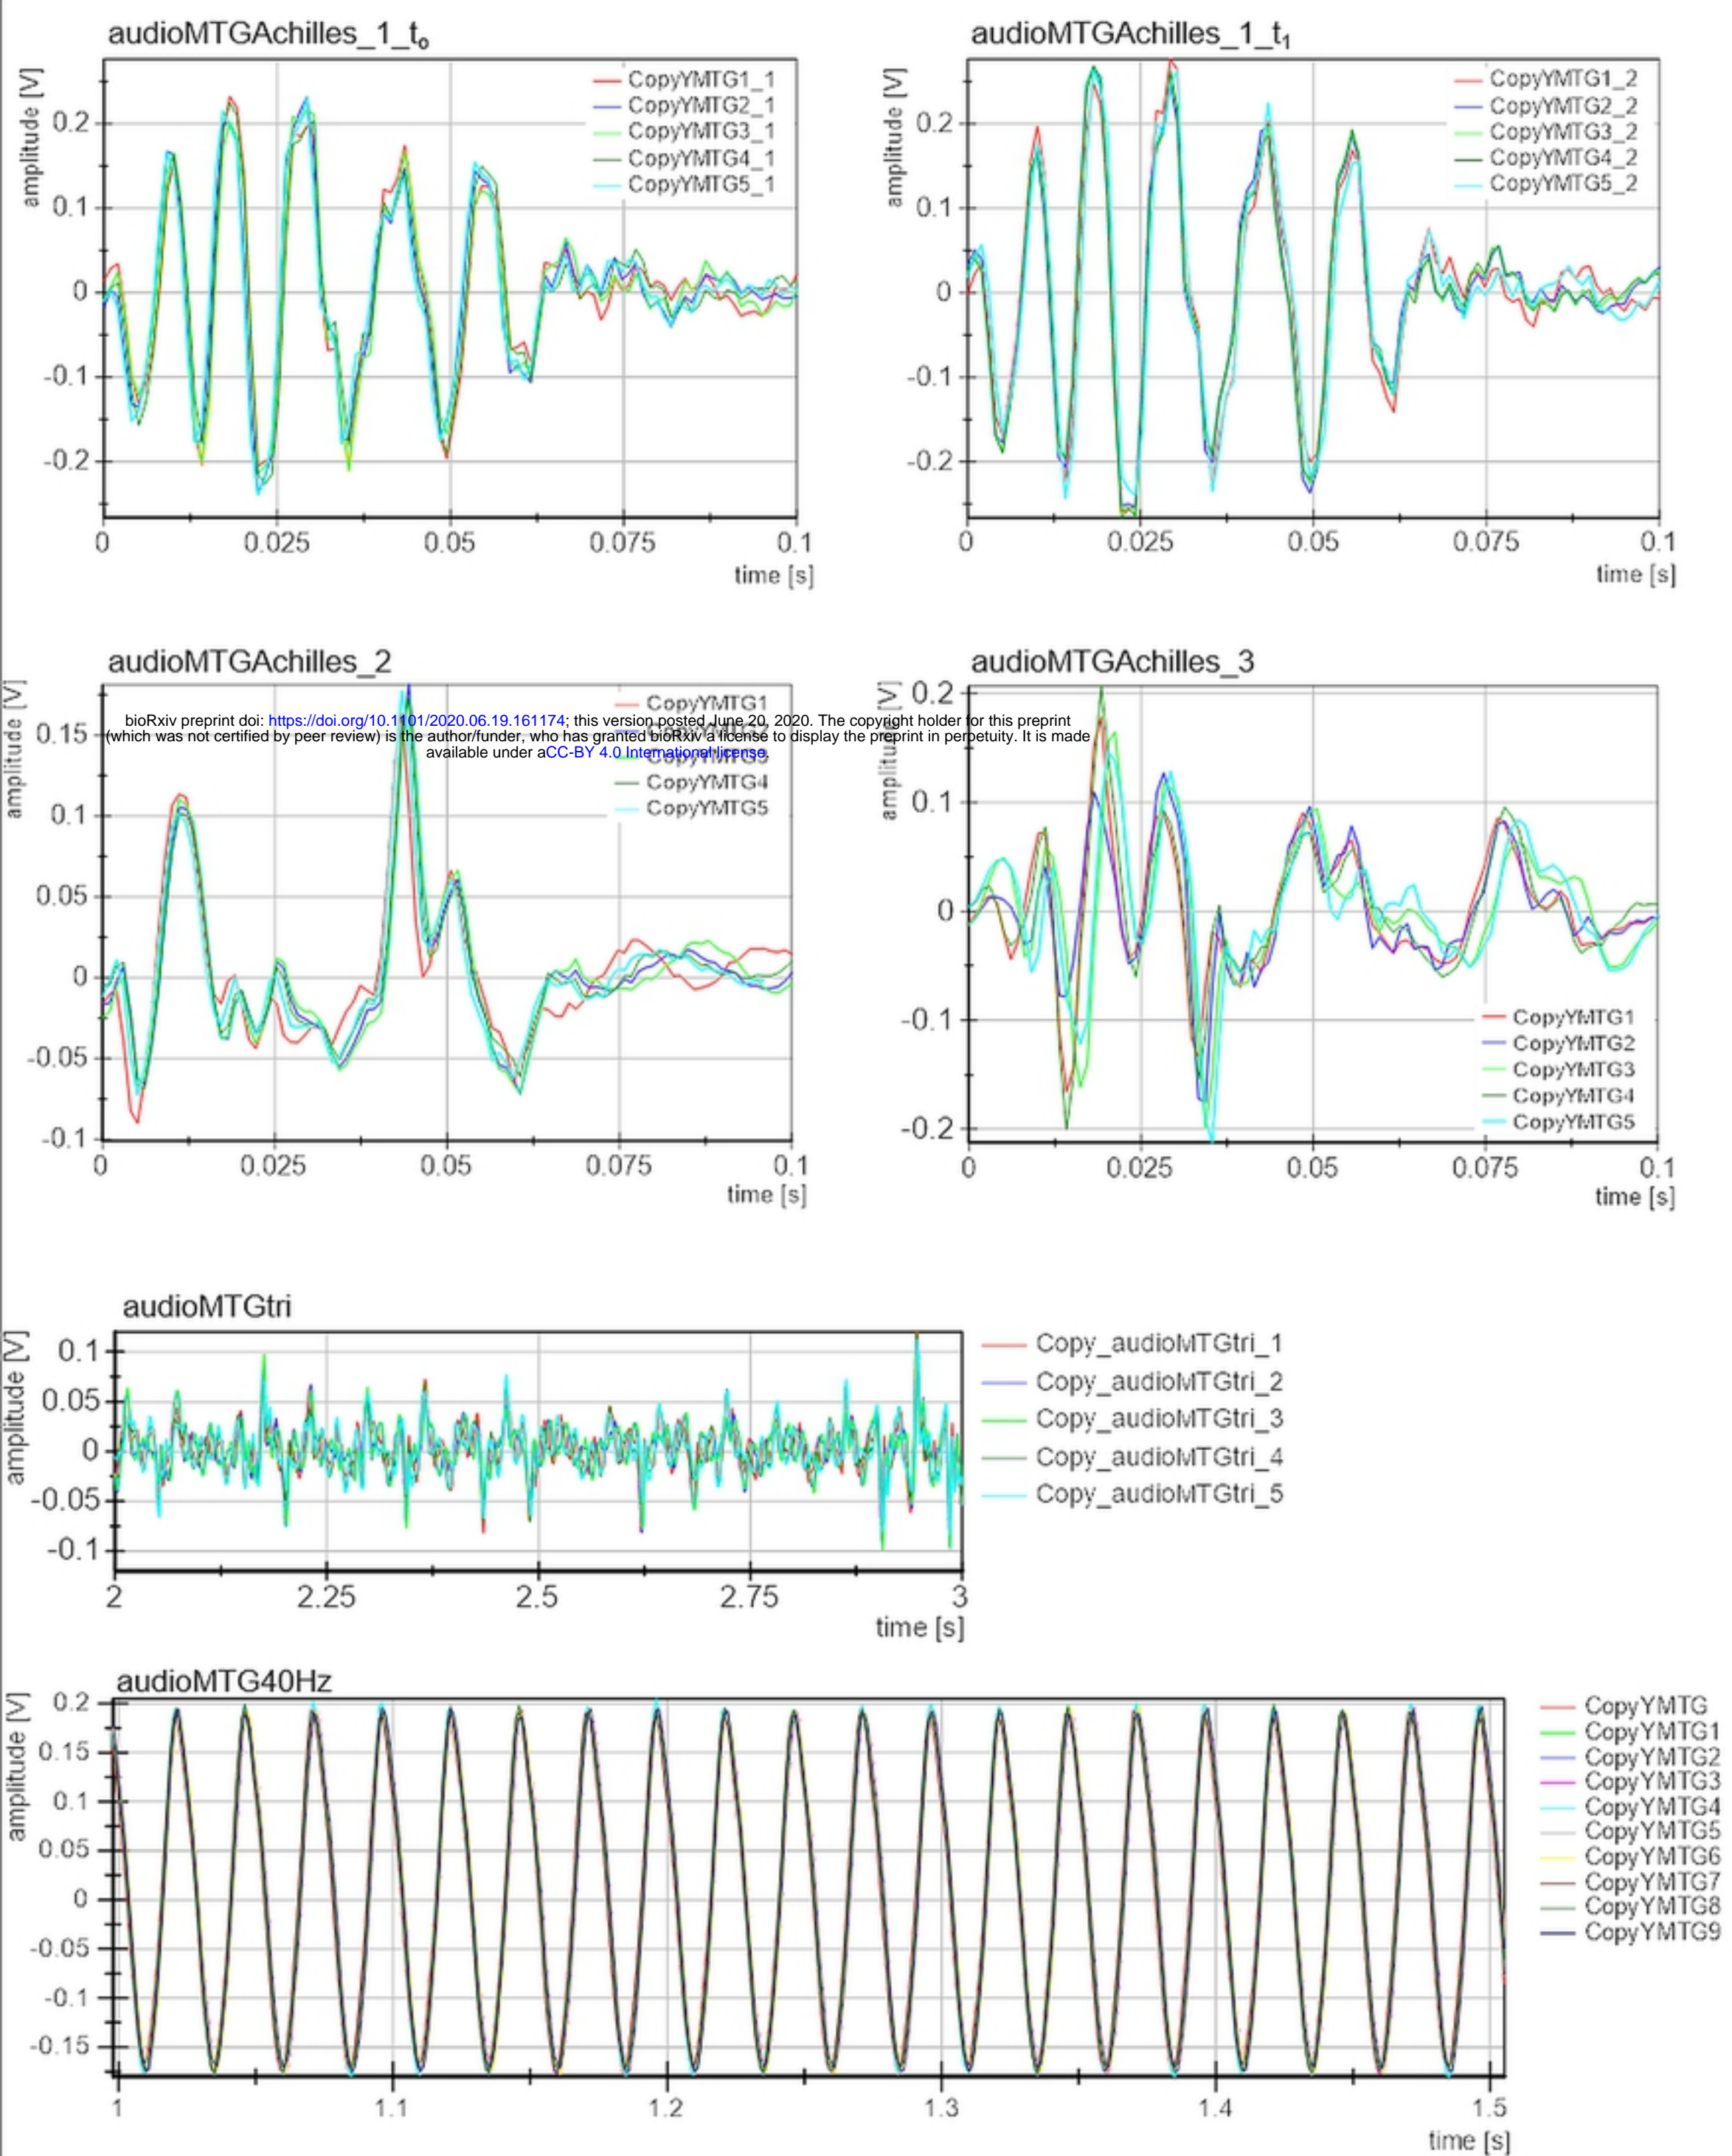

Figure 3
